# Supplementary material for: Microbial single-strand annealing proteins enable CRISPR gene-editing tools with improved knock-in efficiencies and reduced off-target effects
Source: PubMed Central journal article supplement — Nucleic Acids Res. 2021 Feb 22;49(6):e36. doi: 10.1093/nar/gkaa1264 (PMC8034634; doi:10.1093/nar/gkaa1264), 2021-02-22
Supplement: gkaa1264_supplemental_file.pdf [file gkaa1264_supplemental_file.pdf]

## **SUPPLEMENTARY DATA**

### **Microbial Single-strand Annealing Proteins Enable CRISPR Gene-editing Tools with Improved Knock-in Efficiencies and Reduced Off-target Effects**

Supplementary Notes and Sequences

Supplementary Figs. S1 to S12

Supplementary Tables S1 to S3

Supplementary Sequences

## SUPPLEMENTARY NOTES AND SEQUENCES

### SUPPLEMENTARY NOTE

#### Step-by-step gene-editing protocol using REDIT plasmids

##### A. Design of guideRNA sequences at target genomic loci

This step is the same as standard Cas9 experiments. Briefly, based on the Cas9 enzyme used, target sequence (usually 20-bp) near the knock-in or editing sites can be selected next to the protospacer adjacent motif (PAM). For SpCas9 use “NGG” and for SaCas9 use “NNGRRT”. We usually append extra “G” base to the beginning of the guide sequence to facilitate U6/Pol-III transcription initiation if the first base of the guide sequence is not “G”. Two DNA oligos could be ordered based on selected guides, with golden gate cloning overhangs, as shown below.

5' -CACCGNNNNNNNNNNNNNNNNNNNNNN -3'

3' -CNNNNNNNNNNNNNNNNNNNNNNCAA -5'

N denotes the guide sequences. Standard desalting oligos are sufficient for this cloning. The two oligos above will be annealed to form the insert fragments in the next step.

##### B. Annealing of two DNA oligos for each guideRNA target. Perform phosphorylation and annealing of each pair of oligos via reaction setup below.

|                             |       |
|-----------------------------|-------|
| oligo1 Top (100uM)          | 1ul   |
| oligo2 Bottom (100uM)       | 1ul   |
| 10X T4 ligation Buffer(NEB) | 1ul   |
| ddH2O                       | 6.5ul |
| T4 PNK (NEB)                | 0.5ul |
| Total                       | 10ul  |

Anneal in a thermocycler using the following parameters:

37C 30 min

95C 5 min and then ramp down to 25C at 5C/min

C1. Golden Gate Cloning of annealed oligos into sgRNA/Cas9 (REDIT) plasmid

For wild-type Cas9 REDIT, one guide RNA is needed and the backbone vectors for the cloning will bear BbsI cloning sites matching the annealed oligos from Step B. The REDIT plasmids for this step will be: **pREDIT\_Cas9-MS2-BB\_BbsI** (see list of plasmids at end of protocol)

| Item                          | Volume | Note                       |
|-------------------------------|--------|----------------------------|
| Water                         | 4.3 ul |                            |
| Cutsmart Buffer               | 0.8 ul | 10x                        |
| T4 ligase                     | 0.2 ul |                            |
| BbsI-HF                       | 0.4 ul |                            |
| ATP (25mM)                    | 0.3 ul | ~ final 1mM                |
| REDIT plasmid/vector          | 1 ul   | ~ 50ng total REDIT plasmid |
| Annealed Oligo (1:10 diluted) | 1 ul   | diluted 10ul into 100ul    |
| Total                         | 8 ul   |                            |

This protocol uses a minimal amount of enzyme and could be scaled up as needed. After set up the golden gate reaction (on ice), immediately move the reaction into Thermocycler and perform the golden gate reaction using the following parameters:

37C 5 min

16C 5 min

cycle for ~20 cycles, additional cycles up to 50 could be used to maximize efficiency

65C 5 min

4C hold

After the reaction, perform bacterial transformation as per standard protocol of the competent cells used in the lab.

C2. Golden Gate Cloning of annealed oligos into sgRNA/Cas9n (REDITn) plasmid

For Cas9 REDITn using Cas9n (nickase), one or two guide RNAs can be used with double guideRNAs providing slightly better efficiency of editing. The backbone vectors for the cloning will bear BbsI cloning sites matching the annealed oligos from Step B. The REDIT plasmids for this step will be: **pREDIT\_Cas9n-MS2-BB\_BbsI** (see list of plasmids at end of protocol)

| Item  | Volume | Note      |
|-------|--------|-----------|
| Water | 4.3 ul | Add first |

|                               |        |                            |
|-------------------------------|--------|----------------------------|
| Cutsmart Buffer               | 0.8 ul | 10x                        |
| T4 ligase                     | 0.2 ul |                            |
| BbsI-HF                       | 0.4 ul |                            |
| ATP (25mM)                    | 0.3 ul | ~ final 1mM                |
| REDITn plasmid/vector         | 1 ul   | ~ 50ng total REDIT plasmid |
| Annealed Oligo (1:10 diluted) | 1 ul   | diluted 10ul into 100ul    |
| Total                         | 8 ul   |                            |

Golden Gate reaction setup and transformation steps are similar as above.

#### D. Preparation of HDR templates

Please refer to Supplementary Sequences for template used in the study and examples of template designs are illustrated as in Fig. 1A. We recommend using a dsDNA template with at least 200bp of homology arms on each end of the insertion/replacement sequences (the edited portion of the template). We suggest cloning the template into simple plasmids such as pUC19, then, restriction digestion of plasmids or standard PCR (using primers such as listed in the Supplementary table S2) could be employed for generating large amounts of dsDNA templates.

#### E. Perform gene-editing via delivery of REDIT/REDITn plasmids and template DNA

With previous steps, the 3 components of REDIT editing method are ready for experiments: the guideRNA/Cas9 plasmid (cloned in step A-C), the template DNA (from step D), and the SSAP plasmid (pREDIT\_MCP-RecT, can be obtained from Addgene). For delivery into cells in vitro, routine transfection or electroporation could be performed following the recommended conditions by the reagent or equipment manufacturer and selected based on the cell types. For HEK293T cells as an example, a typical transfection condition is described below:

1. One day before transfection, 2.5E4 HEK293T cells seeded on each well of 96-well plate, the cell density should be around 70% on the next day at the time of transfection.
2. For lipofectamine 3000 as the transfection reagent, use a total of 250 ng DNA + 0.4 ul Lip3000 reagents (ea.) and perform the reagent set up using 10 ul of Opti-MEM per well, as in the manufacturer's protocol.
3. Transfection material:  
REDIT guideRNA plasmids, 125ng (for double-nicking design, use equal amount of the

two guideRNA plasmids, i.e. 62.5ng each); pREDIT\_MCP-RecT, 75ng;  
 Template DNA, up to 50ng.

4. Mix plasmids with template DNA and perform transfection according to the manufacturer's protocol for HEK293T cells.
5. 12-24 hours after transfection, if applicable could switch to fresh media.
6. After at least 3 days post transfection, cells could be harvested or proceed to downstream experiments or analysis as needed.

**List of REDIT and REDITn Plasmids (all will be available at Addgene via plasmid ID)**

| <b>Plasmid ID</b>                | <b>Detailed Description</b>                            |
|----------------------------------|--------------------------------------------------------|
| <b>SpCas9 REDIT Plasmids</b>     |                                                        |
| pREDIT_Cas9-MS2-BB_Bbsl          | pU6-MS2-gRNA-backbone(Bbsl)-CBH-SpCas9-T2A-EBFP        |
| pREDIT_MCP-RecT                  | pLenti-EF1A-MCP-EXTEN-RecT-NLS                         |
| <b>SpCas9 REDITn/dn Plasmids</b> |                                                        |
| pREDIT_Cas9n-MS2-BB_Bbsl         | pU6-MS2-gRNA-backbone(Bbsl)-CBH-SpCas9n(D10A)-T2A-EBFP |
| pREDIT_MCP-RecT                  | Same as above                                          |
| <b>SaCas9 REDIT plasmids</b>     |                                                        |
| pREDIT_SaCas9-MS2-BB_Bsal        | pU6-MS2-gRNA-backbone(Bsal)-CBH-SaCas9-T2A-EBFP        |
| pREDIT_MCP-RecT                  | Same as above                                          |
| <b>SaCas9 REDITn/dn plasmids</b> |                                                        |
| pREDIT_SaCas9n-MS2-BB_Bsal       | pU6-MS2-gRNA-backbone(Bsal)-CBH-SaCas9(D10A)-T2A-EBFP  |
| pREDIT_MCP-RecT                  | Same as above                                          |

|                             |                                                    |
|-----------------------------|----------------------------------------------------|
| <b>Suntag RecT plasmids</b> |                                                    |
| pCBH-Cas9-Suntag-BB_BbsI    | pU6-gRNA-backbone(BbsI)-CBH-SpCas9-Suntag-T2A-EBFP |
| pEF1A-scFV-RecT             | pLenti-EF1A-scFV-GS-NLS-RecT                       |

## SUPPLEMENTARY SEQUENCES

### SV40 NLS amino acid sequence:

PKKKRKV

### Ty1 NLS amino acid sequence:

NSKKRSLEDNETEIKVSRDTWNTKNMRSLEPPRSKKRIH

### c-Myc NLS amino acid sequence:

PAAKRVKLD

### biSV40 NLS amino acid sequence:

KRTADGSEFESPKKKRKV

### GS linker sequence:

GGGSGGGSGGGGS

### modified E-XTEN Linker amino acid sequence:

SGGSSGGSSGSETPGTSESATPESSGGSSGGS

### Bacteriophage lambda, Recombination protein bet amino acid sequence:

MSTALATLAGKLAERVGMDSVDPQELITTLRQTAFKGDASDAQFIALLIVANQYGLNPWTKEIYA  
 FPDKQNGIVPVVGVGDGWSRIINENQQFDGMDFEQDNESCTCRIYRKDRNHPICVTEWMDECR  
 REPFKTREGREITGPWQSHPKRMLRHKAMIQCARLAFGFAGIYDKDEAERIVENTAYTAERQP

ERDITPVNDETMQEINTLLIALDKTWDDDLLPLCSQIFRRDIRASSELTQAEAVKALGFLKQKAAE  
QKVAA\*

**Bacteriophage T7, Single-stranded DNA-binding protein gp2.5 amino acid sequence:**

MAKKIFTSALGTAEPYAYIAKPDYGNEERGFGNPRGVYKVDLTIPNKDPRCQRMVDEIVKCHEE  
AYAAAVEEYEANPPAVARGKKPLKPYEGDMPFFDNGDGTTFKFKCYASFQDKKTKETKHINL  
VVVDSKGGKMEDVPIIGGGSKLKVKYSLVPYKWNTAVGASVKLQLESVMLVELATFGGGEDD  
WADEVEENGYVASGSAKASKPRDEESWDEDDEESEEADEDGDF\*

**Rac prophage RecT (EcRecT) amino acid sequence:**

MTKQPPIAKADLQKTQGNRAPAAIKNNDVISFINQPSMKEQLAAALPRHMTAERMIRIATTEIRK  
VPALGNCDTMSFVSAIVQCSQLGLEPGSALGHAYLLPFGNKNEKSGKKNVQLIIGYRGMIDLAR  
RSGQIASLSARVVREGDEFNFEFGLDEKLIHRPGENEDAPVTHVYAVARLKDGGTQFEVMTRK  
QIELVRSQSKAGNNGPWVTHWEEMAKKTAIRRLFYLPVSIEIQRAVSMDEKEPLTIDPADSSV  
LTGEYSVIDNSEE\*

**MS2 coat protein**

MASNFTQFVLVDNNGGTGDVTVAPSNFANGVAEWISSNSRSQAYKVTCSVRQSSAQKRKYTIK  
VEVPKVATQTVGGVELPVAAWRSYLNEMELTIPIFATNSDCELIVKAMQGLLDGNPIPSAIAANS  
GIY\*

**10XGCN**

MEELLSKNYHLENEVARLKKGSGSGEELLSKNYHLENEVARLKKGSGSGEELLSKNYHLENEV  
ARLKKGSGSGEELLSKNYHLENEVARLKKGSGSGEELLSKNYHLENEVARLKKGSGSGEELLS  
KNYHLENEVARLKKGSGSGEELLSKNYHLENEVARLKKGSGSGEELLSKNYHLENEVARLKKG  
SGSGEELLSKNYHLENEVARLKKGSGSGEELLSKNYHLENEVARLKKGSGSGTAVNIGGGTGP  
MDLQRPLNGGGPKKKRKV\*

**scFV**

MGPDIVMTQSPSSLSASVGDRVTITCRSSTGAVTTSNYASWVQEKPGLFKGLIGGTNNRAPG  
VPSRFSGSLIGDKATLTISLQPEDFATYFCALWYSNHVWVFGQGTKVELKRGGGGSGGGGSG  
GGGSSGGGSEVKLLESGGGLVQPGGSLKLSCAVSGFSLTDYGVNWRQAPGRGLEWIGVIW  
GDGITDYNSALKDRFIISKDNGKNTVYLQMSKVRSDDTALYYCVTGLFDYWGGQTLVTVSS\*

## MS2 stem loop insertion sgRNA scaffold (N denotes guide RNA target site sequence)

NNNNNNNNNNNNNNNNNNNNNGTTTAAGAGCTAGGCCAACATGAGGATCACCCATGTCTGC  
AGGGCCTAGCAAGTTTAAATAAGGCTAGTCCGTTATCAACTTGAAAAAGTGGCACCGAGTC  
GGTGC GCGCACATGAGGATCACCCATGTGC

## Template DNA sequences

Annotations of the replaced or inserter editing sequences are detailed below with each of the templates. Unless otherwise noted, when different homology arms are used in the study, we used primers listed in **Table S2** to obtain templates with different homology arm lengths.

## DYNLT1 P2A-mKate knock-in HDR template sequence

### Left Homology Arm-Insertion Sequence-Right Homology Arm

(Underlined are the inserted **mKate** fluorescent protein sequence, the proceeding non-underlined part is the **P2A peptide** sequence)

AGTGACCTGTGTAATTATGCAGAAGAATGGAGCTGGATTACACACAGCAAGTTCCTGCTTC  
TGGGACAGCTCTACTGACGGTATGATTTTCATTCATGTTTGTGAAGTTTTGTTGTGTGAAAT  
ATATGACTGGAAGTTTCTATCTTTGAATGCAATGCATGTTTATCACCTTTTAAACATTTAA  
TAATAGACTTGCCAAGGTTCTTTGTGTAGCATAGAGATGGGTA CTTGAATGTTGGCCTTATT  
GTGAGTAAACGTCGTC CCCCAGCTTTCCCTGCCGTAATGCTGCTCTCTTCCCTCCCGCA  
GGGAGCTGCACTGTGCGATGGGAGAATAAGACCATGTACTGCATCGTCAGTGCCTTCGGA  
CTGTCTATTGGAAGCGGAGCTACTAACTTCAGCCTGCTGAAGCAGGCTGGAGACGTGGAG  
GAGAACCCTGGACCTGCCACC GTGAGCGAGCTGATTAAGGAGAACATGCACATGAAGCTG  
TACATGGAGGGCACCGTGAACAACCACCACTTCAAGTGCACATCCGAGGGCGAAGGCAAG  
CCCTACGAGGGCACCCAGACCATGAGAATCAAGGCGGTCGAGGGCGGCCCTCTCCCTT  
CGCCTTCGACATCCTGGCTACCAGCTTCATGTACGGCAGCAAACCTTCATCAACCACACC  
CAGGGCATCCCCGACTTCTTTAAGCAGTCCTTCCCCGAGGGCTTCACATGGGAGAGAGTC  
ACCACATACGAAGATGGGGGCGTGCTGACCGCTACCCAGGACACCAGCCTCCAGGACGG  
CTGCCTCATCTACAACGTCAAGATCAGAGGGGTGAACTTCCCATCCAACGGCCCTGTGAT  
GCAGAAGAAAACACTCGGCTGGGAGGCCTCCACCGAGACACTGTACCCCGCTGACGGCG  
GCCTGGAAGGCAGAGCCGACATGGCCCTGAAGCTCGTGGGCGGGGGCCACCTGATCTGC  
AACCTTAAGACCACATACAGATCCAAGAAACCCGCTAAGAACCTCAAGATGCCCGGCGTCT  
ACTATGTGGACAGGAGACTGGAAAGAATCAAGGAGGCCGACAAAGAGACATACGTTCGAGC  
AGCACGAGGTGGCTGTGGCCAGATACTGCGACCTCCCTAGCAAACCTGGGGCACAAACTTA  
ATTCCTAAC CAGCTGTCCtGCCTATGGCCTTTCTCCTTTTGTCTCTAGTTCATCCTCTAACCA  
CCAGCCATGAATTCAGTGAACCTTTTTCTCATTCTCTTTGTTTTGTGGCACTTTCACAATGTA  
GAGGAAAAAACCAAATGACCGCACTGTGATGTGAATGGCACCGAAGTCAGATGAGTATCC  
CTGTAGGTCACCTGCAGCCTGCGTTGCCACTTGTCTTAACTCTGAATATTTCAATTCAAAGG  
TGCTAAAATCTGAAATCTGCTAGTGTGAACTTGCTCTACTCTGAAATGATTCAAATACA  
CTAATTTTCCATACTTTATACTTTTGTGAGAATAAATTATTCAAATCTAAAGTCTGTTGTGTTCC  
TTCATAGTCTGCATAGTATCATAAACG



## HSP90AA1 P2A-mKate knock-in HDR template sequence

### Left Homology Arm-Insertion Sequence-Right Homology Arm

(Underlined are the inserted **mKate** fluorescent protein sequence, the proceeding non-underlined part is the **P2A peptide** sequence)

GCAGCAAAGAAACACCTGGAGATAAACCTGACCATTCCATTATTGAGACCTTAAGGCAA  
AGGCAGAGGCTGATAAGAACGACAAGTCTGTGAAGGATCTGGTCATCTTGCTTTATGAAAC  
TGCGCTCCTGTCTTCTGGCTTCAGTCTGGAAGATCCCCAGACACATGCTAACAGGATCTAC  
AGGATGATCAAACCTTGGTCTGGGTAAGCCTTATACTATGTAATGTTAAAAAGAAAATAACA  
CACGTGACATTGAAGAAAATGGTGAACTTTCAGTTATCCAACTTGGAGCACCTTGTCTG  
CTTGCTGCTTGGAGGTATTAAGTATGTTTTTTTTAGGGATAAGTAAGGTCTTACAAGAGCA  
AAGAAATGAAATTGAGACTCATATGTCCTGTAATACTGTCTTGAAAGCAGATAGAAACCAAG  
AGTATTACCCTAATAGCTGGCTTTAAGAAATCTTTGTAATATGAGGATTTTATTTTGGAAACA  
GGTATTGATGAAGATGACCCTACTGCTGATGATACCAGTGCTGCTGTAECTGAAGAAATGC  
CACCCCTTGAAGGAGATGACGACACATCACGCATGGAAGAAGTAGACGGAAGCGGAGCTA  
CTAACTTCAGCCTGCTGAAGCAGGCTGGAGACGTGGAGGAGAACCCTGGACCTGTGAGC  
GAGCTGATTAAGGAGAACATGCACATGAAGCTGTACATGGAGGGCACCGTGAACAACCAC  
CACTTCAAGTGACATCCGAGGGCGAAGGCAAGCCCTACGAGGGCACCCAGACCATGAG  
AATCAAGGCGGTCGAGGGCGGCCCTCTCCCTTCGCCTTCGACATCCTGGCTACCAGCTT  
CATGTACGGCAGCAAACCTTCATCAACCACACCCAGGGCATCCCCGACTTCTTTAAGCAG  
TCCTTCCCCGAGGGCTTCACATGGGAGAGAGTCACCACATACGAAGATGGGGGCGTGCTG  
ACCGTACCCAGGACACCAGCCTCCAGGACGGCTGCCTCATCTACAACGTCAAGATCAGA  
GGGTGAACTTCCATCCAACGGCCCTGTGATGCAGAAGAAACACTCGGCTGGGAGGC  
CTCCACCGAGACTGTACCCCGCTGACGGCGGCCTGGAAGGCAGAGCCGACATGGCCC  
TGAAGCTCGTGGGCGGGGGCCACCTGATCTGCAACCTTAAGACCACATACAGATCCAAGA  
AACCCGCTAAGAACCTCAAGATGCCCGGCGTCTACTATGTGGACAGGAGACTGGAAGAA  
TCAAGGAGGCCGACAAAGAGACATACGTGAGCAGCAGAGGTGGCTGTGGCCAGATAC  
TGCGACCTCCCTAGCAAACCTGGGGCACAACTTAATTCCTAAATCTGTGGCTGAGGGATGA  
CTTACCTGTTCACTACTCTACAATTCCTCTGATAATATATTTTCAAGGATGTTTTTCTTTATTT  
TTGTTAATATTAAGTCTGTATGGCATGACAACCTTTAAGGGGAAGATAAGATTTCTG  
TCTACTAAGTGATGCTGTGATACCTTAGGCACTAAAGCAGAGCTAGTAATGCTTTTTGAGTT  
TCATGTTGGTTTATTTTACAGATTGGGGTAACGTGCACTGTAAGACGTATGTAACATGATG  
TTAACTTTGTGGTCTAAAGTGTGTTAGCTGTCAAGCCGGATGCCTAAGTAGACCAAATCTTGT  
TATTGAAGTGTCTGAGCTGTATCTTGATGTTTAGAAAAGTATTCGTTACATCTTGTAGGATC  
TACTTTTTGAACTTTTCATTCCCTGTAGTTGACAATTCTGCATGTACTAGTCCTCTAGAAATA  
GGTTAACTGAAGCAACTTGATGGAAGGATCTCTCCACAGGGCTTGTTTTCCAAAGAAAAG  
TATTGTTTGGAGGAGCAAAGTTAAAAGCCTACCTAAGCATATCGTAAAGCTGTTCAAAAATA  
ACTCAGACCCAGTCTTGTGGA

## AAVS1 P2A-mKate knock-in HDR template sequence

### Left Homology Arm-Insertion Sequence-Right Homology Arm

(Underlined are the inserted **mKate** fluorescent protein sequence, the proceeding non-underlined part is the **P2A peptide** sequence)

GATGCTCTTTCCGGAGCACTTCCTTCTCGGCGCTGCACCACGTGATGTCCTCTGAGCGGA  
TCCTCCCCGTGTCTGGGTCTCTCCGGGCATCTCTCCTCCCTCACCCAACCCCATGCCGT  
CTTCACTCGCTGGGTTCCCTTTTCTTCTCCTTCTGGGGCCTGTGCCATCTCTCGTTTCTTA  
GGATGGCCTTCTCCGACGGATGTCTCCCTTGCCTCCCGCCTCCCCTTCTTGTAGGCCTGC  
ATCATCACCGTTTTTCTGGACAACCCCAAAGTACCCCGTCTCCCTGGCTTTAGCCACCTCT  
CCATCCTCTTGCTTTCTTTGCCTGGACACCCCGTTCTCCTGTGGATTCCGGGTACCTCTCA  
CTCCTTTTCAATTTGGGCAGCTCCCCTACCCCCCTTACCTCTCTAGTCTGTGCTAGCTCTTCCA  
GCCCCCTGTCATGGCATCTTCCAGGGGTCCGAGAGCTCAGCTAGTCTTCTTCCCTCCAACC  
CGGGCCCCTATGTCCACTTCAGGACAGCATGTTTGTGCTCCAGGGATCCTGTGTCCCC  
GAGCTGGGACCACCTTATATTCCAGGGCCGGTTAATGTGGCTCTGGTTCTGGGTACTTTT  
ATCTGTCCCCTCCACCCCACAGTGGGGCAAGCTTCTGACCTCTTCTTCTCCTCCCACAGGG  
CCTCGAGAGATCTGGCAGCGGAGGAAGCGGAGCTACTAACTTCAGCCTGCTGAAGCAGG  
CTGGAGACGTGGAGGAGAACCCTGGACCTGTGAGCGAGCTGATTAAGGAGAACATGCACA  
TGAAGCTGTACATGGAGGGCACCGTGAACAACCACCATTCAAGTGCACATCCGAGGGCG  
AAGGCAAGCCCTACGAGGGCACCCAGACCATGAGAATCAAGGCGGTGAGGGCGGGCCCT  
CTCCCCTTCGCCTTCGACATCCTGGCTACCAGCTTCATGTACGGCAGCAAACCTTCATCA  
ACCACACCCAGGGCATCCCCGACTTCTTTAAGCAGTCCTTCCCCGAGGGCTTCACATGGG  
AGAGAGTCACCACATACGAAGATGGGGGCGTGTGACCGCTACCCAGGACACCAGCCTC  
CAGGACGGCTGCCTCATCTACAACGTCAAGATCAGAGGGGTGAACTTCCCATCCAACGGC  
CCTGTGATGCAGAAGAAAACACTCGGCTGGGAGGCCTCCACCGAGACACTGTACCCCGCT  
GACGGCGGCCTGGAAGGCAGAGCCGACATGGCCCTGAAGCTCGTGGGCGGGGGCCACC  
TGATCTGCAACCTTAAGACCACATACAGATCCAAGAAACCCGCTAAGAACCTCAAGATGCC  
CGGCGTCTACTATGTGGACAGGAGACTGGAAAGAATCAAGGAGGCCGACAAAGAGACATA  
CGTCGAGCAGCACGAGGTGGCTGTGGCCAGATACTGCGACCTCCCTAGCAAACCTGGGGC  
ACAAACTTAATTCCTAACTAGGGACAGGATTGGTGACAGAAAAGCCCCATCCTTAGGCCT  
CCTCCTTCTAGTCTCCTGATATTGGGTCTAACCCCCACCTCCTGTTAGGCAGATTCCTTAT  
CTGGTGACACACCCCCATTTCTGGAGCCATCTCTCCTTGCCAGAACCTCTAAGGTTTG  
CTTACGATGGAGCCAGAGAGGATCCTGGGAGGGAGAGCTTGGCAGGGGGTGGGAGGGA  
AGGGGGGGATGCGTGACCTGCCCGTTCTCAGTGGCCACCCTGCGCTACCCTCTCCCAG  
AACCTGAGCTGCTCTGACGCGGCTGTCTGGTGCCTTCACTGATCCTGGTGTGCTGCAGCTT  
CCTTACACTTCCAAGAGGAGAAGCAGTTTGGAAAAACAAAATCAGAATAAGTTGGTCCTG  
AGTTCTAACTTTGGCTCTTACCTTTCTAGTCCCCAATTTATATTGTTCTCCGTGCGTCAG  
TTTTACCTGTGAGATAAGGCCAGTAGCCAGCCCCGTCTGGCAGGGCTGTGGTGAGGAGG  
GGGGTGTCCGTGTGGAAAACCTCCCTTTGTGAGAATGGTGCCTCCTAGGTGTTACCAGGT  
CGTGGCCGCCTCTACTCCCTTTCTCTTTCTCCATCCTTCTTCTTAAAGAGTCCCCAGTGC  
TATCTGGGACATATTCTCCGCCAGAGCAGGGTCCCGCTTCCCTAAGGCCCTGCTCTGG  
GCTTCTGGGTTTGGATCCTTGGC

#### OCT4 P2A-mKate knock-in HDR template sequence

##### Left Homology Arm-Insertion Sequence-Right Homology Arm

(Underlined are the inserted **mKate** fluorescent protein sequence, the proceeding non-underlined part is the **P2A peptide** sequence)

GCGACTATGCACAACGAGAGGATTTTGGAGGCTGCTGGGTCTCCTTTCTCAGGGGGACCAG  
TGTCTTTCTCTGGCCCCAGGGCCCCATTTTGGTACCCAGGCTATGGGAGCCCTCACT  
TCACTGCACTGTACTCCTCGGTCCCTTTCCCTGAGGGGGAAGCCTTTCCCCCTGTCTCCGT  
CACCCTCTGGGCTCTCCCATGCATTCAAATGGAAGCGGAGCTACTAACTTCAGCCTGCTG  
AAGCAGGCTGGAGACGTGGAGGAGAACCCTGGACCTGCCACCATGGTGAGCGAGCTGAT  
TAAGGAGAACATGCACATGAAGCTGTACATGGAGGGCACCGTGAACAACCACCACTTCAA  
GTGCACATCCGAGGGCGAAGGCAAGCCCTACGAGGGCACCCAGACCATGAGAATCAAGG  
CGGTCGAGGGCGGCCCTCTCCCTTCGCCTTCGACATCCTGGCTACCAGCTTCATGTACG  
GCAGCAAACCTTCATCAACCACACCCAGGGCATCCCCGACTTCTTTAAGCAGTCCTTCCC  
CGAGGGCTTCACATGGGAGAGAGTCACCACATACGAAGATGGGGGCGTGCTGACCGCTA  
CCCAGGACACCAGCCTCCAGGACGGCTGCCTCATCTACAACGTCAAGATCAGAGGGGTGA  
ACTTCCCATCCAACGGCCCTGTGATGCAGAAGAAAACACTCGGCTGGGAGGCCTCCACCG  
AGACACTGTACCCCGCTGACGGCGGCCCTGGAAGGCAGAGCCGACATGGCCCTGAAGCTC  
GTGGGCGGGGGCCACCTGATCTGCAACCTTAAGACCACATACAGATCCAAGAAACCCGCT  
AAGAACCTCAAGATGCCCGCGTCTACTATGTGGACAGGAGACTGGAAAGAATCAAGGAG  
GCCGACAAAGAGACATACGTCGAGCAGCACGAGGTGGCTGTGGCCAGATACTGCGACCT  
CCCTAGCAAACCTGGGGCACAACTTAATTCCTAATGACTAGGAATGGGGGACAGGGGGAG  
GGGAGGAGCTAGGGAAAGAAAACCTGGAGTTTGTGCCAGGGTTTTTGGGATTAAGTTCTT  
CATTACTAAGGAAGGAATTGGGAACACAAAGGGTGGGGGCAGGGGAGTTTGGGGCAAC  
TGGTTGGAGGGAAGGTGAAGTTCAATGATGCTCTTGATTTTAATCCACATCATGTACT  
TTTTTCTTAAATAAAGAAGCCTGGGACACAGTAGATAGACACTT

### ACTB P2A-mKate knock-in HDR template sequence

#### Left Homology Arm-Insertion Sequence-Right Homology Arm

(Underlined are the inserted **mKate** fluorescent protein sequence, the proceeding non-underlined part is the **P2A peptide** sequence)

TGTGGTGTGTGGGGAGCTGTCACATCCAGGGTCTCACTGCCTGTCCCCTTCCCTCCTCA  
GATCATTGCTCCTCCTGAGCGCAAGTACTCCGTGTGGATCGGCGGCTCCATCCTGGCCTC  
GCTGTCCACCTTCCAGCAGATGTGGATCAGCAAGCAGGAGTATGACGAGTCCGGCCCTC  
CATCGTCCACCGCAAAGTGTTCGGAAGCGGAGCTACTAACTTCAGCCTGCTGAAGCAGGC  
TGAGACGTGGAGGAGAACCCTGGACCTGTGAGCGAGCTGATTAAGGAGAACATGCACAT  
GAAGCTGTACATGGAGGGCACCGTGAACAACCACCACTTCAAGTGCACATCCGAGGGCGA  
AGGCAAGCCCTACGAGGGCACCCAGACCATGAGAATCAAGGCGGTGAGGGCGGCCCTC  
TCCCCTTCGCCTTCGACATCCTGGCTACCAGCTTCATGTACGGCAGCAAACCTTCATCAA  
CCACACCCAGGGCATCCCCGACTTCTTTAAGCAGTCCTTCCCCGAGGGCTTCACATGGGA  
GAGAGTCACCACATACGAAGATGGGGGCGTGCTGACCGCTACCCAGGACACCAGCCTCC  
AGGACGGCTGCCTCATCTACAACGTCAAGATCAGAGGGGTGAACTTCCCATCCAACGGCC  
CTGTGATGCAGAAGAAAACACTCGGCTGGGAGGCCTCCACCGAGACACTGTACCCCGCTG  
ACGGCGGCCTGGAAGGCAGAGCCGACATGGCCCTGAAGCTCGTGGGCGGGGGCCACCT  
GATCTGCAACCTTAAGACCACATACAGATCCAAGAAACCCGCTAAGAACCTCAAGATGCC  
GGCGTCTACTATGTGGACAGGAGACTGGAAAGAATCAAGGAGGCCGACAAAGAGACATAC  
GTCGAGCAGCACGAGGTGGCTGTGGCCAGATACTGCGACCTCCCTAGCAAACCTGGGGCA  
CAAACCTTAATTCCTAATAGGCGGACTATGACTTAGTTGCGTTACACCCTTTCTTGACAAAAC

CTAACTTGCGCAGAAAACAAGATGAGATTGGCATGGCTTTATTTGTTTTTTTTGTTTTGTTTT  
GTTTTTTTTTTTTTTTTTTGGCTTGACTCAGGATTTAAAACTGGAACGGTGAAGGTGACAGC  
AGTCGGTTGGAGCGAGCATCCCCAAAGTTCACAATGTGGCCGAGGACTTTGATTGCACA  
TTGTTGTTTTTTAATAGTCATTCCAAATATGAGATGCGTTGTTACAGGAAGTCCCTTGCCAT  
CCTAAAAGCCACCCCACTTCTCTCTAAGGAGAATGGCCAGTCTCTCCCAAGTCCACACA  
GGGGAGGTGATAGCATTGCTTTCGTGTAA

### EMX1 HDR template sequence

#### Left Homology Arm-Insertion/Replacement Sequence-Right Homology Arm

(Underlined are the inserted **BsrGI** restriction site, i.e. TGTACA)

CATTCTGCCTCTCTGTATGGAAAAGAGCATGGGGCTGGCCCGTGGGGTGGTGTCCACTTT  
AGGCCCTGTGGGAGATCATGGGAACCCACGCAGTGGGTCATAGGCTCTCTCATTTACTAC  
TCACATCCACTCTGTGAAGAAGCGATTATGATCTCTCCTCTAGAACTCGTAGAGTCCCAT  
GTCTGCCGGCTTCCAGAGCCTGCACTCCTCCACCTTGGCTTGGCTTGGCTTGGCTGGGGCTAGAG  
GAGCTAGGATGCACAGCAGCTCTGTGACCCTTTGTTTGGAGAGGAACAGGAAAACCACCCT  
TCTCTCTGGCCCACTGTGTCTCTTCTGCCCTGCCATCCCCTTCTGTGAATGTTAGACCC  
ATGGGAGCAGCTGGTCAGAGGGGACCCCGGCTGGGGCCCTAACCTATGTAGCCTCA  
GTCTTCCCATCAGGCTCTCAGCTCAGCCTGAGTGTTGAGGCCCCAGTGGCTGCTCTGGGG  
GCCTCCTGAGTTTCTCATCTGTGCCCTCCCTCCCTGGCCCAAGGTGAAGGTGTGGTTCCA  
GAACCGGAGGACAAAGTACAAACGGCAGAAGCTGGAGGAGGAAGGGCCTGAGTCCGAGC  
AGAAGAAGAAGGGCTCCCATCACATCAACCGGTGGCGCATTGCCACGAAGCAGGCCAATG  
GGGAGGACATCGATGTCACCTCCAATGACTCGGATGTACACGGTCTGCAACCACAAACCC  
ACGAGGGCAGAGTGCTGCTTGTGCTGGCCAGGCCCTGCGTGGGCCCAAGCTGGACTC  
TGCCCACTCCCTGGCCAGGCTTTGGGGAGGCTGGAGTCATGGCCCCACAGGGCTTAA  
GCCCCGGGGCCGCCATTGACAGAGGGACAAGCAATGGGCTGGCTGAGGCCTGGGACCACT  
TGGCCTTCTCCTCGGAGAGCCTGCCTGCCTGGGCGGGCCCGCCCGCCACCGCAGCCTCC  
CAGCTGCTCTCCGTGTCTCCAATCTCCCTTTTGTGTTTATGATGCATTTCTGTTTTAATTTATTT  
CCAGGCACCACTGTAGTTTAGTGATCCCAGTGTCCTTCCCTATGGGAATAATAAAAAG  
TCTCTCTTAATGACACGGGCATCCAGCTCCAGCCCCAGAGCCTGGGGTGGTAGATTCC  
GGCTCTGAGGGCCAGTGGGGGCTGGTAGAGCAAACGCGTTCAGGGCCTGGGAGCCTGG  
GGTGGGGTACTGGTGGAGGGGGTCAAGGGTAATTCATTAACCTCCTCTTTTTGTTGGGGG  
ACCCTGGTCTCTACCTCCAGCTCCACAGCAGGAGAAACAGGCTAGACATAGGGAAGGGCC  
ATCCTGTATCTTGAGGGAGGACAGGCCAGGTCTTCTTAACGTATTGAGAGGTGGGAATC  
AGGCCAGGTAGTTCAATGGG

### VEGFA HDR template sequence

#### Left Homology Arm-Insertion/Replacement Sequence-Right Homology Arm

(Underlined are the inserted **XbaI** restriction site, i.e. TCTAGA)

AGGTTTGAATCATCACGCAGGCCCTGGCCTCCACCCGCCCCACCAGCCCCCTGGCCTCA  
GTTCCCTGGCAACATCTGGGGTTGGGGGGCAGCAGGAACAAGGGCCTCTGTCTGCCCA  
GCTGCCTCCCCCTTTGGGTTTTGCCAGACTCCACAGTGCATACGTGGGCTCCAACAGGTC

CTCTTCCCTCCCAGTCACTGACTAACCCCGGAACCACACAGCTTCCCGTTCTCAGCTCCAC  
AAACTTGGTGCCAAATTCTTCTCCCTGGGAAGCATCCCTGGACTTCCCAAAGGACCCC  
AGTCACTCCAGCCTGTTGGCTGCCGCTCACTTTGATGTCTGCAGGCCAGATGAGGGCTCC  
AGATGGCACATTGTGAGAGGGACACACTGTGGCCCTGTGCCAGCCCTGGGCTCTCTGT  
ACATGAAGCAACTCCAGTCCCAAATATGTAGCTGTTTGGGAGGTGAGAAATAGGGGGTCCA  
GGAGCAAACCTCCCCCACCCCTTTCCAAAGCCATTCCCTCTTTAGCCAGAGCCGGGGT  
GTGCAGACGGCAGTCACTAGGGGGCGCTCGGCCACCACAGGGAAGCTGGGTGAATGGAG  
CGAGCAGCGTCTTCGAGAGTGAGGACGTGTGTGTCTGTGTGGGTGAGTGAGTGTGCGCA  
CTCTAGAGGTGTCGTGTTGAGGGCGTTGGAGCGGGGAGAAGGCCAGGGGTCACTCCAGG  
ATTCCAATAGATCTGTGTGTCCCTCTCCCCACCCGTCCCTGTCCGGCTCTCCGCCTTCCCC  
TGCCCCCTTCAATATTCTAGCAAAGAGGGAACGGCTCTCAGGCCCTGTCCGCACGTAAC  
CTCACTTTCTGCTCCCTCCTCGCCAATGCCCCGCGGGCGCGTGTCTCTGGACAGAGTTT  
CCGGGGGCGGATGGGTAAATTTTTCAGGCTGTGAACCTTGGTGGGGGTGAGCTTCCCCTTC  
ATTGCGGCGGGCTGCGGGCCAGGCTTCACTGAGCGTCCGCAGAGCCCGGGCCCGAGCC  
GCGTGTGGAAGGGCTGAGGCTCGCCTGTCCCCGCCCCCGGGGCGGGCCGGGGGCGG  
GGTCCCGGCGGGGCGGAGCCATGCGCCCCCCCCCTTTTTTTTTTAAAGTCGGCTGGTAGC  
GGGAGGATCGCGGAGGCTTGGGGCAGCCGGGTAGCTCGGAGGTCGTGGCGCTGGGGG  
CTAGCACCAGCGCTCTGTGCGGAGGCGCAGCGTTAGGTGGACCGGTCAGCGGACTCAC  
CGGCCAGGGCGCTCGGTGCTGGAATTTGATATTCAATTGATCCGGGTTTTATCCCTCTTCTT  
TTTTCTTAAACATTTTTTTTTTAAACTGTATTGTTTCTCGTTTTAATTTATTTTTGCTTGCCATT  
CCCCACTTGAAT

#### DYNLT1 mKate-T2A-EGFP HDR template

##### Left Homology Arm-mKate-T2A-EGFP-Right Homology Arm

(Underlined are the inserted mKate/EGFP fluorescent protein sequence, with the connecting non-underlined T2A peptide sequence)

TGCCGTAAATGCTGCTCTCTTCCCTCCCGCAGGGAGCTGCACTGTGCGATGGGAGAATAA  
GACCATGTACTGCATCGTCAGTGCCTTCGGACTGTCTATTGGAAGCGGAGCTACTAACTTC  
AGCCTGCTGAAGCAGGCTGGAGACGTGGAGGAGAACCCTGGACCTGCCACCATGGTGAG  
CGAGCTGATTAAGGAGAACATGCACATGAAGCTGTACATGGAGGGCACCGTGAACAACCA  
CCACTTCAAGTGCACATCCGAGGGCGAAGGCAAGCCCTACGAGGGCACCCAGACCATGA  
GAATCAAGGCGGTGAGGGCGGCCCTCTCCCTTCGCCTTCGACATCCTGGCTACCAGCT  
TCATGTACGGCAGCAAACCTTCATCAACCACACCAGGGCATCCCCGACTTCTTTAAGCA  
GTCTTCCCCGAGGGCTTCACATGGGAGAGAGTCACCACATACGAAGATGGGGGCGTGCT  
GACCGTACCCAGGACACCAGCCTCCAGGACGGCTGCCTCATCTACAACGTCAAGATCAG  
AGGGGTGAACTTCCCATCCAACGGCCCTGTGATGCAGAAGAAAACACTCGGCTGGGAGGC  
CTCCACCGAGACTGTACCCCGCTGACGGCGGCCTGGAAGGCAGAGCCGACATGGCCC  
TGAAGCTCGTGGGCGGGGGCCACCTGATCTGCAACCTTAAGACCACATACAGATCCAAGA  
AACCCGCTAAGAACCTCAAGATGCCCGGCGTCTACTATGTGGACAGGAGACTGGAAGAA  
TCAAGGAGGCCGACAAAGAGACATACGTGAGCAGCACGAGGTGGCTGTGGCCAGATAC  
TGCGACCTCCCTAGCAAACCTGGGGCACAACTTAATTCCGCTAGCGGCAGTGGAGAGGGC  
AGAGGAAGTCTGCTAACATGCGGTGACGTGAGGAGAATCCTGGCCAGTGAGCAAGGG  
CGAGGAGCTGTTCAACGGGGTGGTGCCATCCTGGTTCGAGCTGGACGGCGACGTAACG

GCCACAAGTTCAGCGTGTCCGGCGAGGGCGAGGGCGATGCCACCTACGGCAAGCTGACC  
CTGAAGTTCATCTGCACCACCGGCAAGCTGCCCGTGCCCTGGCCCACCCTCGTGACCACC  
CTGACCTACGGCGTGCAGTGCTTCAGCCGCTACCCCGACCACATGAAGCAGCACGACTTC  
TTCAAGTCCGCCATGCCCGAAGGCTACGTCCAGGAGCGCACCATCTTCTTCAAGGACGAC  
GGCAACTACAAGACCCGCGCCGAGGTGAAGTTCGAGGGCGACACCCTGGTGAACCGCAT  
CGAGCTGAAGGGCATCGACTTCAAGGAGGACGGCAACATCCTGGGGCACAAGCTGGAGT  
ACAACACTACAACAGCCACAACGTCTATATCATGGCCGACAAGCAGAAGAACGGCATCAAGGT  
GAACTTCAAGATCCGCCACAACATCGAGGACGGCAGCGTGCAGCTCGCCGACCACTACCA  
GCAGAACACCCCATCGGCGACGGCCCGTGCTGCTGCCCGACAACCACTACCTGAGCA  
CCCAGTCCGCCCTGAGCAAAGACCCCAACGAGAAGCGCGATCACATGGTCTGCTGGAGT  
TCGTGACCGCCGCCGGGATCACTCTCGGCATGGACGAGCTGTACAAGTGACCAGCTGTCC  
tGCCTATGGCCTTTCTCCTTTTGTCTCTAGTTCATCCTCTAACCACCAGCCATGAATTCAGTG  
AACTCTTTTCTCATTCTCTTTGTTTTGTGGCACTTTCACAATGTAGAGGAAAAACCAAATGA  
CCGCACTGTGATGTGAATGGCACCGAAGTCAGATGAGTATCCCTGTAGGTCACCTGCAGC  
CTGCGTTGCCACTTGTCTT

### HSP90AA1 mKate-T2A-EGFP HDR template

#### Left Homology Arm-mKate-T2A-EGFP-Right Homology Arm

(Underlined are the inserted mKate/EGFP fluorescent protein sequence, with the connecting non-underlined T2A peptide sequence)

TACTGTCTTGAAAGCAGATAGAAACCAAGAGTATTACCCTAATAGCTGGCTTTAAGAAATCT  
TTGTAATATGAGGATTTTATTTTGGAAACAGGTATTGATGAAGATGACCCTACTGCTGATGA  
TACCAGTGCTGCTGTAAGTGAAGAAATGCCACCCCTTGAAGGAGATGACGACACATCACG  
CATGGAAGAAGTAGACGGAAGCGGAGCTACTAACTTCAGCCTGCTGAAGCAGGCTGGAGA  
CGTGGAGGAGAACCCTGGACCTGCCACCATGGTGAGCGAGCTGATTAAGGAGAACATGCA  
CATGAAGCTGTACATGGAGGGCACCGTGAACAACCACTTCAAGTGCACATCCGAGGG  
CGAAGGCAAGCCCTACGAGGGCACCCAGACCATGAGAATCAAGGCGGTGAGGGCGGCC  
CTCTCCCCTTCGCCTTCGACATCCTGGCTACCAGCTTCATGTACGGCAGCAAAACCTTCAT  
CAACCACACCCAGGGCATCCCCGACTTCTTTAAGCAGTCCCTTCCCCGAGGGCTTCACATG  
GGAGAGAGTCAACACATACGAAGATGGGGGCGTGCTGACCGTACCCAGGACACCAGCC  
TCCAGGACGGCTGCCTCATCTACAACGTCAAGATCAGAGGGGTGAACCTCCCATCCAACG  
GCCCTGTGATGCAGAAGAAAACACTCGGCTGGGAGGCCTCCACCGAGACACTGTACCCC  
GCTGACGGCGGCCTGGAAGGCAGAGCCGACATGGCCCTGAAGCTCGTGGGCGGGGGCC  
ACCTGATCTGCAACCTTAAGACCACATACAGATCCAAGAAACCCGCTAAGAACCTCAAGAT  
GCCCGGCGTCTACTATGTGGACAGGAGACTGGAAAGAATCAAGGAGGCCGACAAAGAGA  
CATACGTGAGCAGCACGAGGTGGCTGTGGCCAGATACTGCGACCTCCCTAGCAAACCTGG  
GGCACAAACTTAATTCCGCTAGCGGCAGTGGAGAGGGCAGAGGAAGTCTGCTAACATGCG  
GTGACGTGAGGAGAATCCTGGCCAGTGAGCAAGGGCGAGGAGCTGTTACCGGGGTG  
GTGCCATCCTGGTCGAGCTGGACGGCGACGTAACGGCCACAAGTTCAGCGTGTCCGG  
CGAGGGCGAGGGCGATGCCACCTACGGCAAGCTGACCCTGAAGTTCATCTGCACCACCG  
GCAAGCTGCCCGTGCCCTGGCCCACCCTCGTGACCACCCTGACCTACGGCGTGCAGTGC  
TTCAGCCGCTACCCCGACCACATGAAGCAGCACGACTTCTTCAAGTCCGCCATGCCCGAA  
GGCTACGTCCAGGAGCGCACCATCTTCTTCAAGGACGACGGCAACTACAAGACCCGCGCC

GAGGTGAAGTTCGAGGGCGACACCCTGGTGAACCGCATCGAGCTGAAGGGCATCGACTT  
CAAGGAGGACGGCAACATCCTGGGGCACAAGCTGGAGTACAACAGCCACAACGT  
CTATATCATGGCCGACAAGCAGAAGAACGGCATCAAGGTGAACTTCAAGATCCGCCACAA  
CATCGAGGACGGCAGCGTGCAGCTCGCCGACCACTACCAGCAGAACACCCCATCGGCG  
ACGGCCCCGTGCTGCTGCCCGACAACCACTACCTGAGCACCCAGTCCGCCCTGAGCAA  
GACCCCAACGAGAAGCGCGATCACATGGTCCTGCTGGAGTTCGTGACCGCCGCCGGGAT  
CACTCTCGGCATGGACGAGCTGTACAAGTGAATCTGTGGCTGAGGGATGACTTACCTGTT  
CAGTACTCTACAATTCCTCTGATAATATATTTTCAAGGATGTTTTTCTTTATTTTGTAAATAT  
TAAAAGTCTGTATGGCATGACAACACTTTAAGGGGAAGATAAGATTTCTGTCTACTAAGT  
GATGCTGTGATACCTTAGGCACTAAAGCAGAGCTAGTAATGCT

## Supplementary Figures

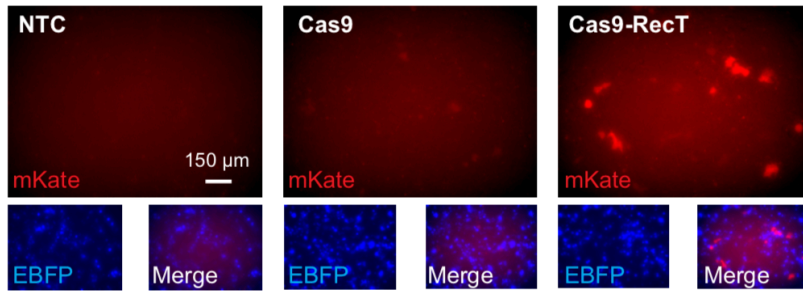

**Fig. S1 Imaging of cells using fluorescent microscopy to confirm mKate knock-in**

Imaging of the expression of knock-in mKate cassette in HEK293T cells under different conditions at *HSP90AA1* locus. EBFP fluorescence represents the transfection positive cells. (NTC, non-targeting control group. scale bar: 150 um).



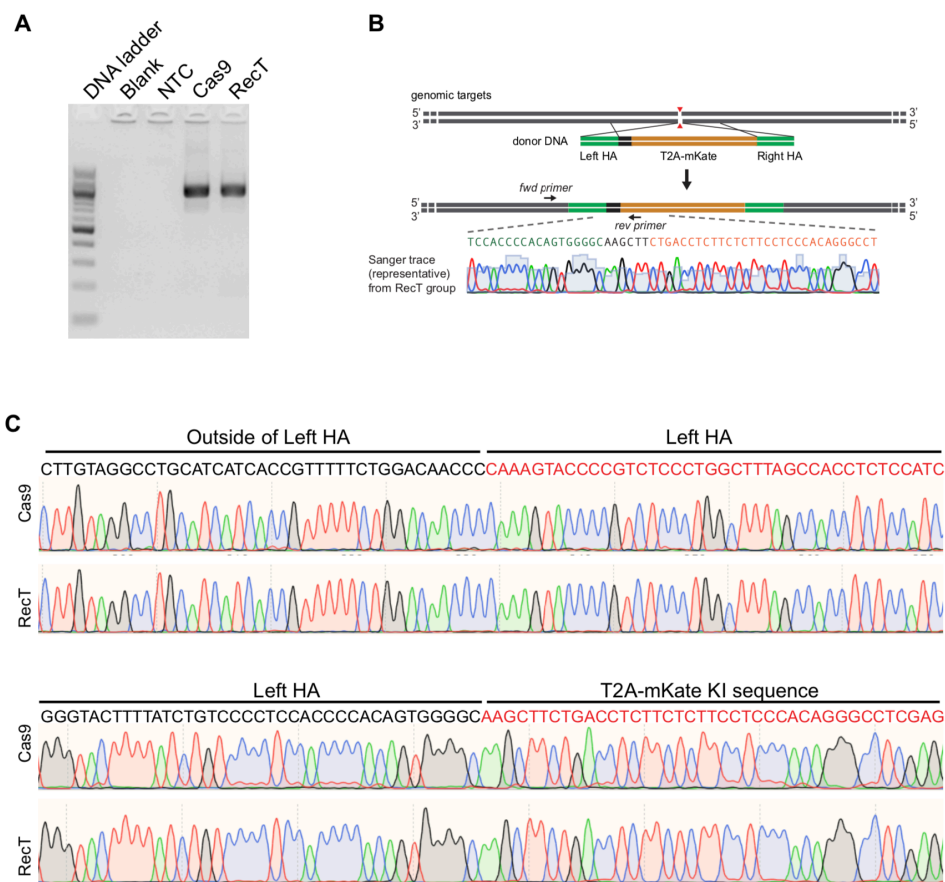

**Fig. S2 Additional data and illustration for junction sequencing for Figure 1**

(A) Full agarose gel image of junction PCR that validates mKate knock-in. (B) Detailed illustration of the junction PCR assay followed by Sanger sequencing (C) Sanger sequencing result of junction PCR product of mKate knock-in at *HSP90AA1* locus.

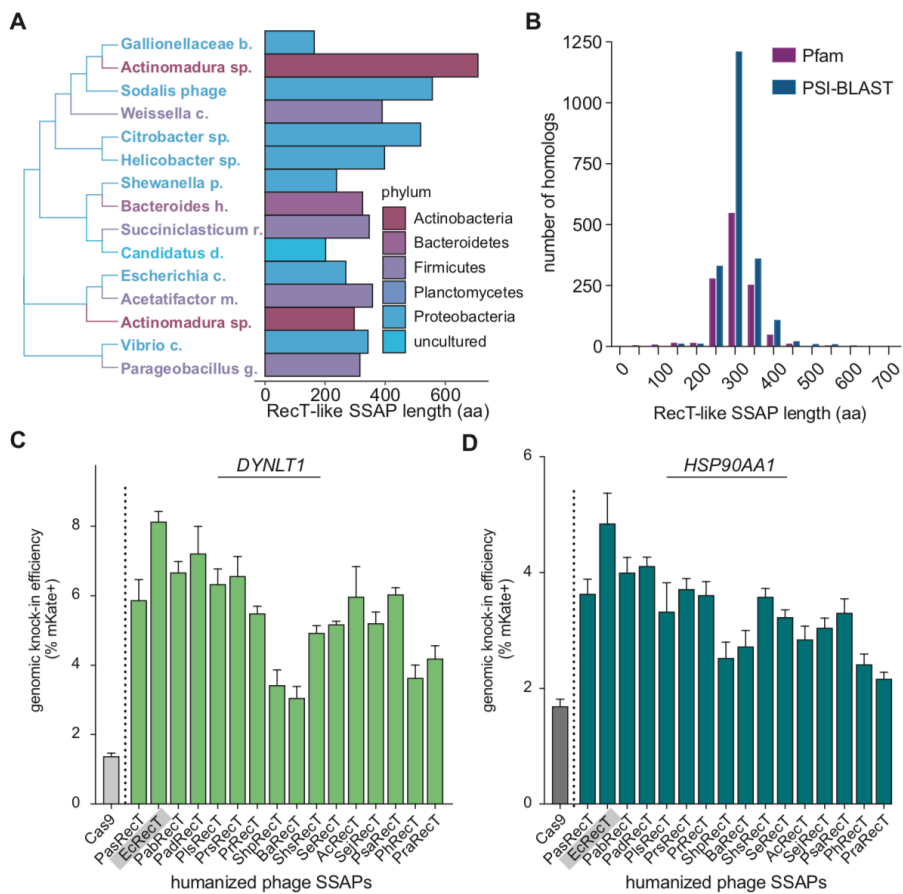

**Fig. S3 Metagenomic screening of RecT homologs for mammalian gene-editing.**

(A) Phylogenetic tree and lengths of representative RecT homologs spanning the diversity of metagenomic RecT-like SSAPs using PSI-BLAST mining, as detailed in the Methods section. (B) Histogram showing the length distribution of RecT-like SSAPs from two major sources for mining RecT homologs, Pfam database and PSI-BLAST results. (C-D) Measuring the gene-editing activities of RecT homologs using the 2A-mKate knock-in assay on two endogenous targets: (C) *DYNLT1* and (D) *HSP90AA1*. The groups corresponding to the top SSAP candidate, EcRecT (the original Rac prophage RecT), are highlighted.

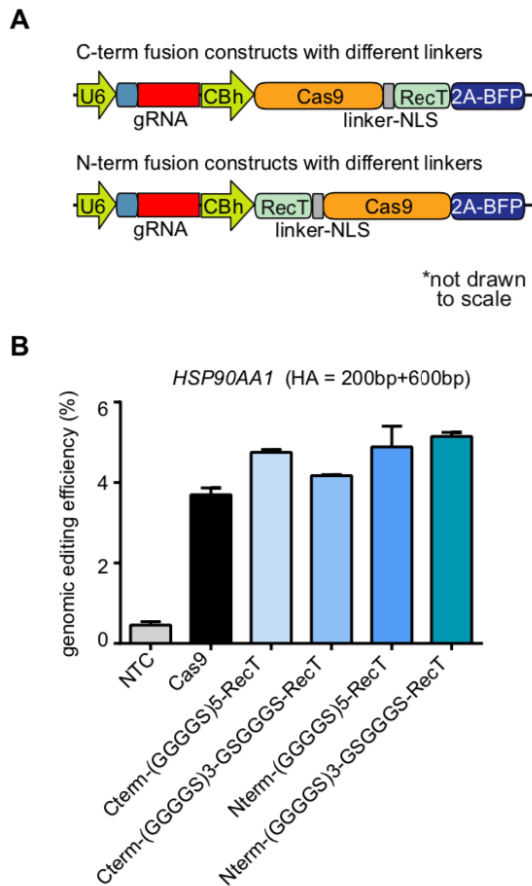

**Fig. S4 Test direct fusion design of using SSAP for gene-editing in HEK293 cells.**

(A) Schematic of direct fusion design. (B) Relative knock-in efficiency of constructs fused RecT to the N-term or C-term of Cas9 using different amino acid linkers at *HSP90AA1* loci in HEK293T cells. Donor HA lengths are labeled on top.

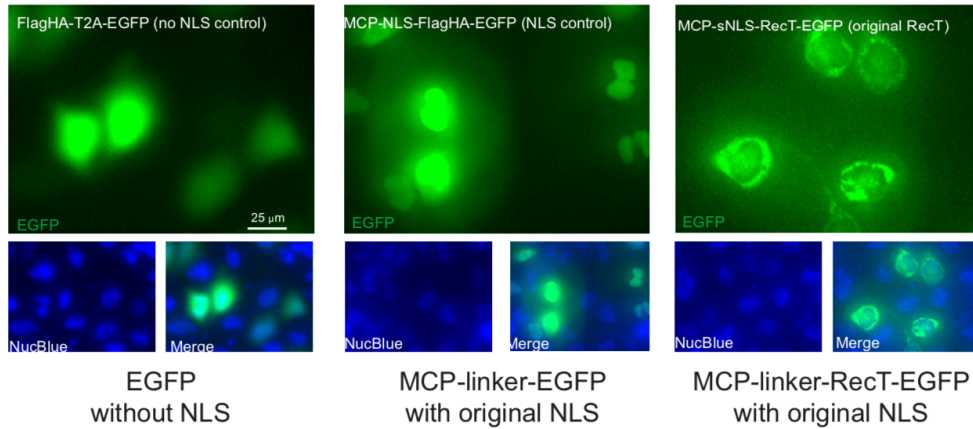

**Fig. S5 RecT nuclear-targeting analysis using fusion GFP design**

To image RecT protein and observe its nuclear-targeting using our originally-selected nuclear-localization signal design, we fused EGFP to the RecT original designed protein. After expression of these GFP-fusion RecT (along with control groups where no or validated NLS were used), we imaged the cells using fluorescent microscopy. RecT is shown here with the presence of fluorescent signals (green channel). Nuclei were stained with NucBlue Probes Reagent (Fisher Scientific) to visualize the cellular nucleus as reference (blue channel). Our original RecT design did not efficiently enter the nucleus, requiring further optimization.

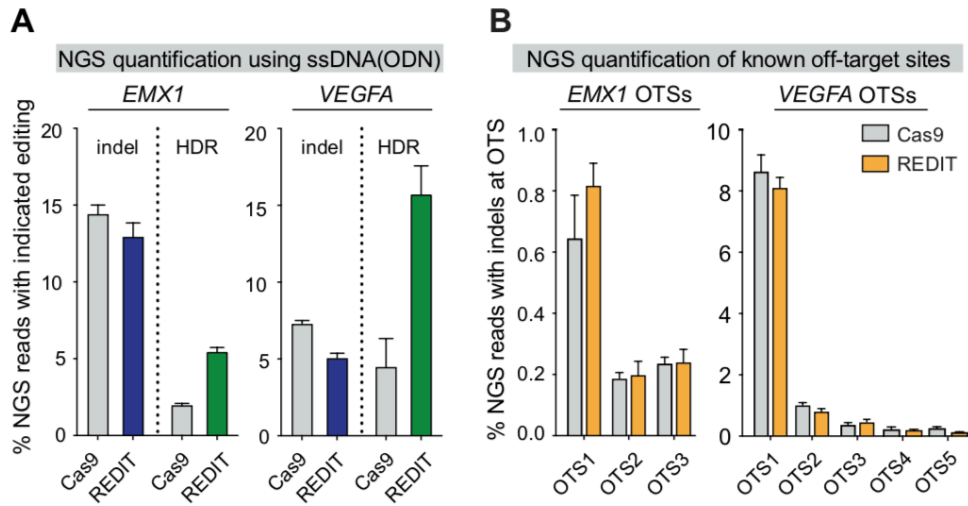

**Fig. S6 Targeted NGS measurement of on/off-target editing events when using REDIT.**

(A) NGS quantification of indel and HDR events at on-target sites at two genomic loci using ssODN donor in 293FT cells. (B) Targeted amplification and NGS quantification of known OTSs for the two guideRNAs being tested.

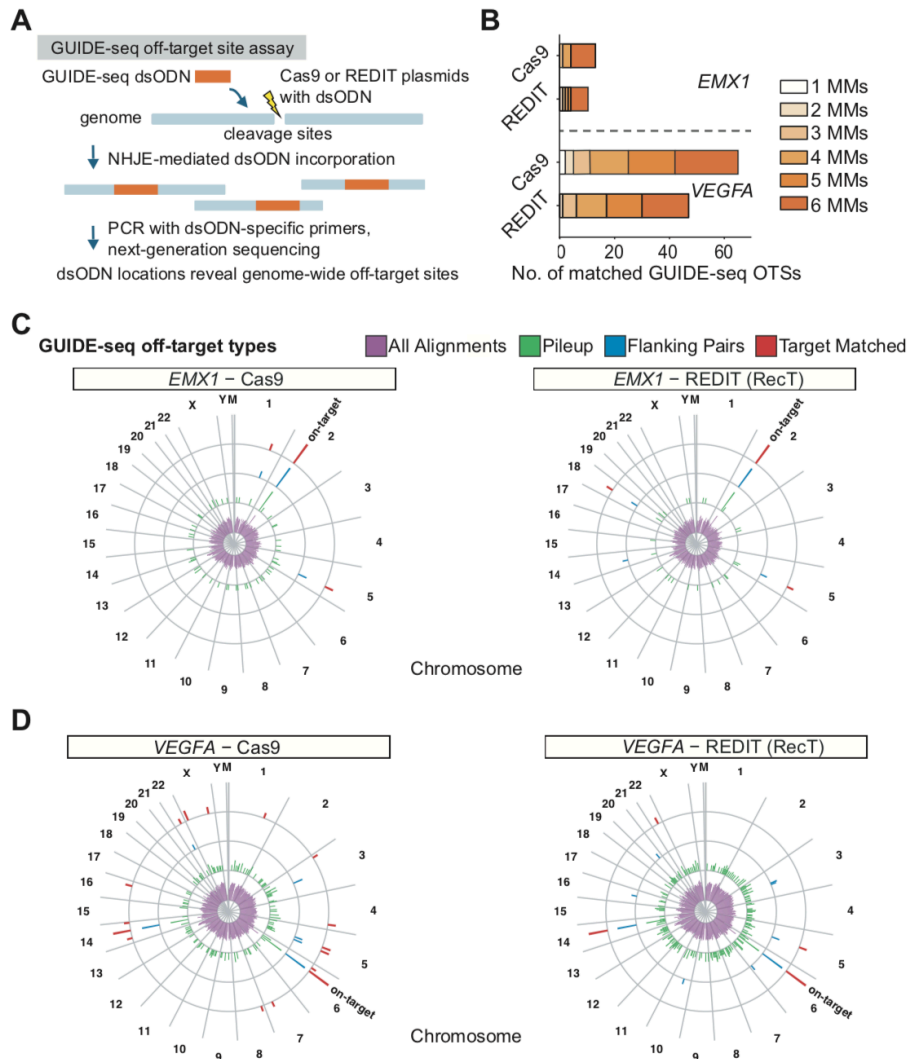

**Fig. S7 GUIDE-seq off-target assay to characterize REDIT compared with Cas9.**

(A) Schematic showing the steps for measuring genomic-wide off-target site (OTS) counts via GUIDE-seq in HEK293T cells (B) OTS sites summary from GUIDE-seq results using two gRNAs with REDIT and Cas9 reference. (C-D) OTS chromosomal distribution comparing Cas9 and REDIT groups, on-target and top OTSs are labeled for VEGF-targeting experiments. For all GUIDE-seq analysis, OTSs colored as: Pileup, alignments that have two or more reads overlapping with each other; flanking pairs, alignments that show up on opposite strands within 200bp upstream of each other; target matched, alignments that match to a treated target in the upstream sequence (up to 6 mismatches, including 1 mismatch in the PAM, are allowed in the target sequence).

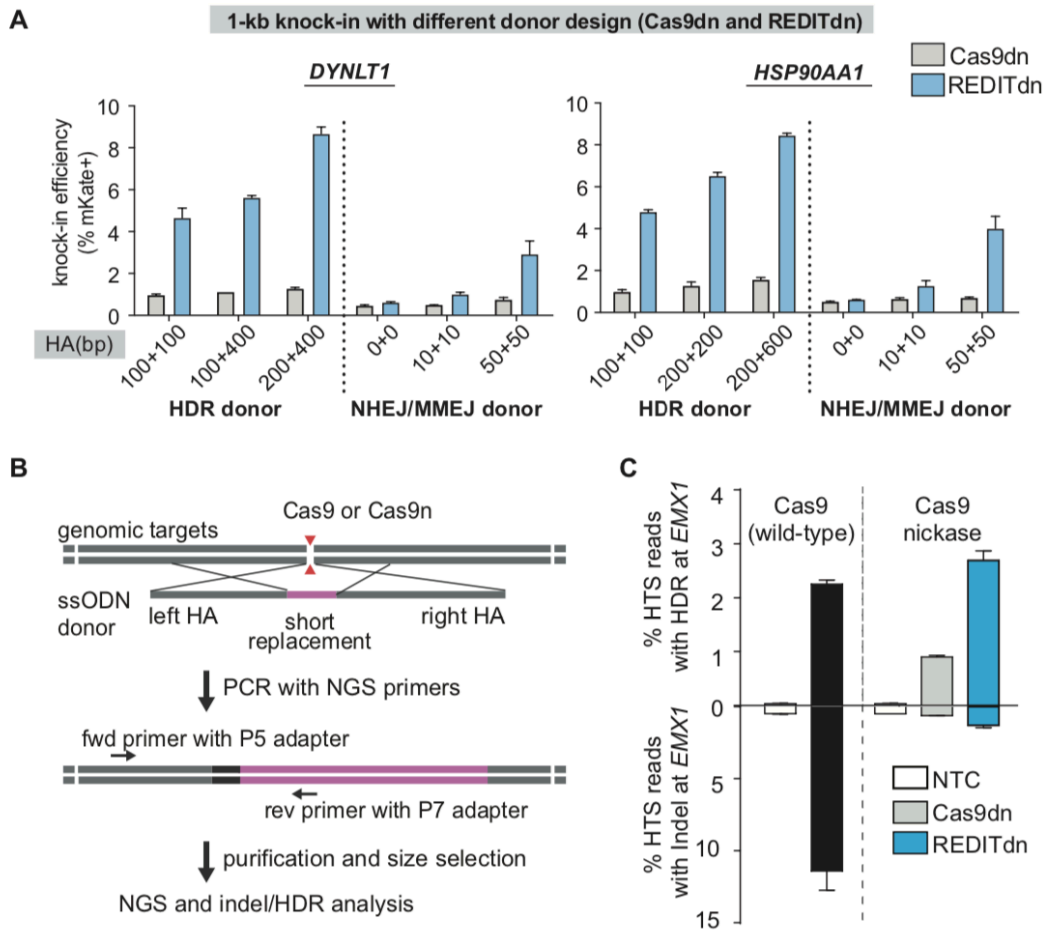

**Fig. S8 Template design tests and NGS analysis of on-target editing for REDITdn**

(A) HA length test comparing different template designs of HDR donors (longer HAs) or NHEJ/MMEJ donors (zero/shorter HAs) using REDITdn and Cas9dn references. (B) Schematic for NGS sample preparation. (C) NGS results for on-target HDR and indel for REDITdn showing the HDR reads and indel reads percentage at EMX1 loci.

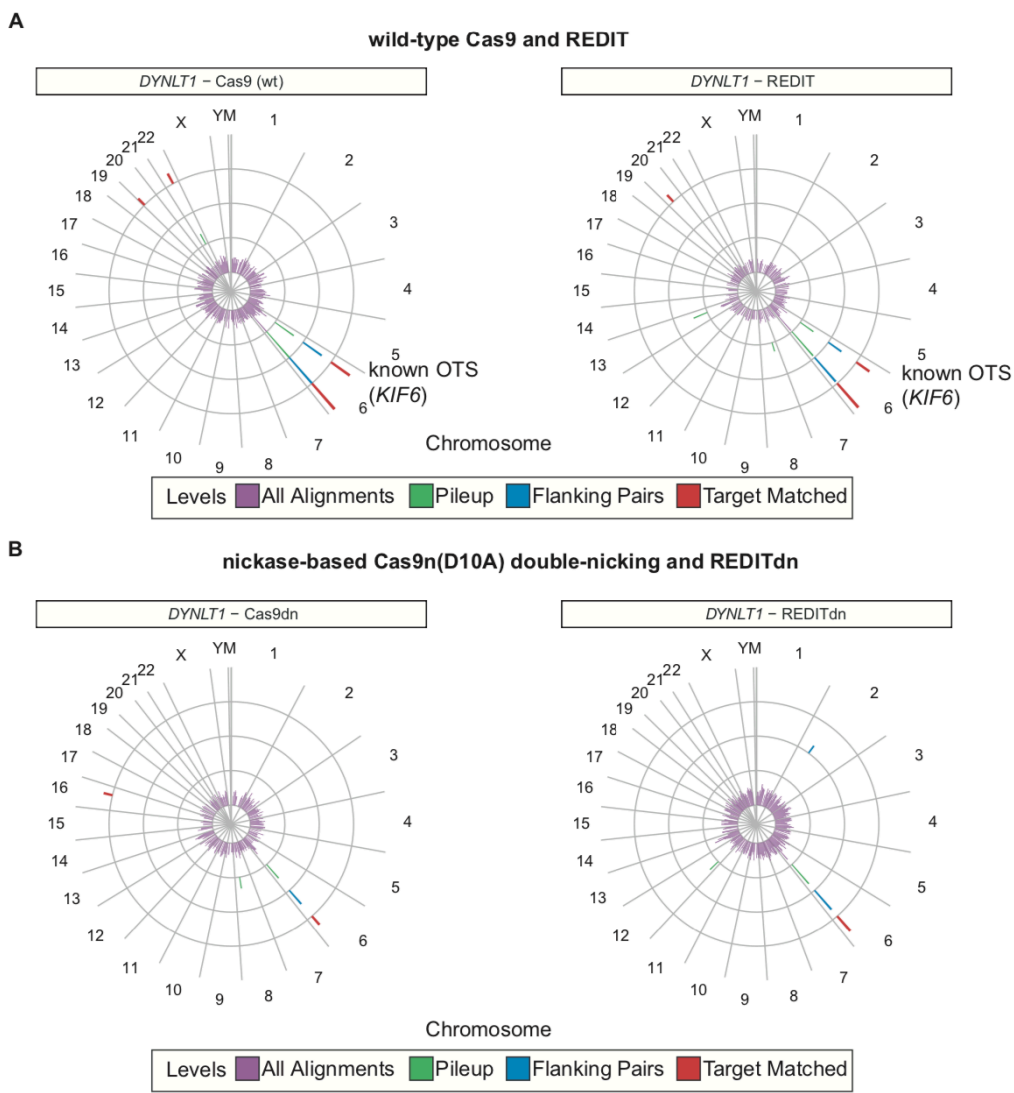

**Fig. S9 GUIDE-seq analysis full data for REDITdn systems**

Genomic distribution of detected off-target sites of REDIT (A) and REDITdn (B) versus Cas9 and Cas9dn benchmarks. Different off-target sites (OTs) were colored as: Pileup, alignments that have two or more reads overlapping with each other; flanking pairs, alignments that show up on opposite strands within 200bp upstream of each other; target matched, alignments that match to a treated target in the upstream sequence (up to 6 mismatches, including 1 mismatch in the PAM, are allowed in the target sequence).



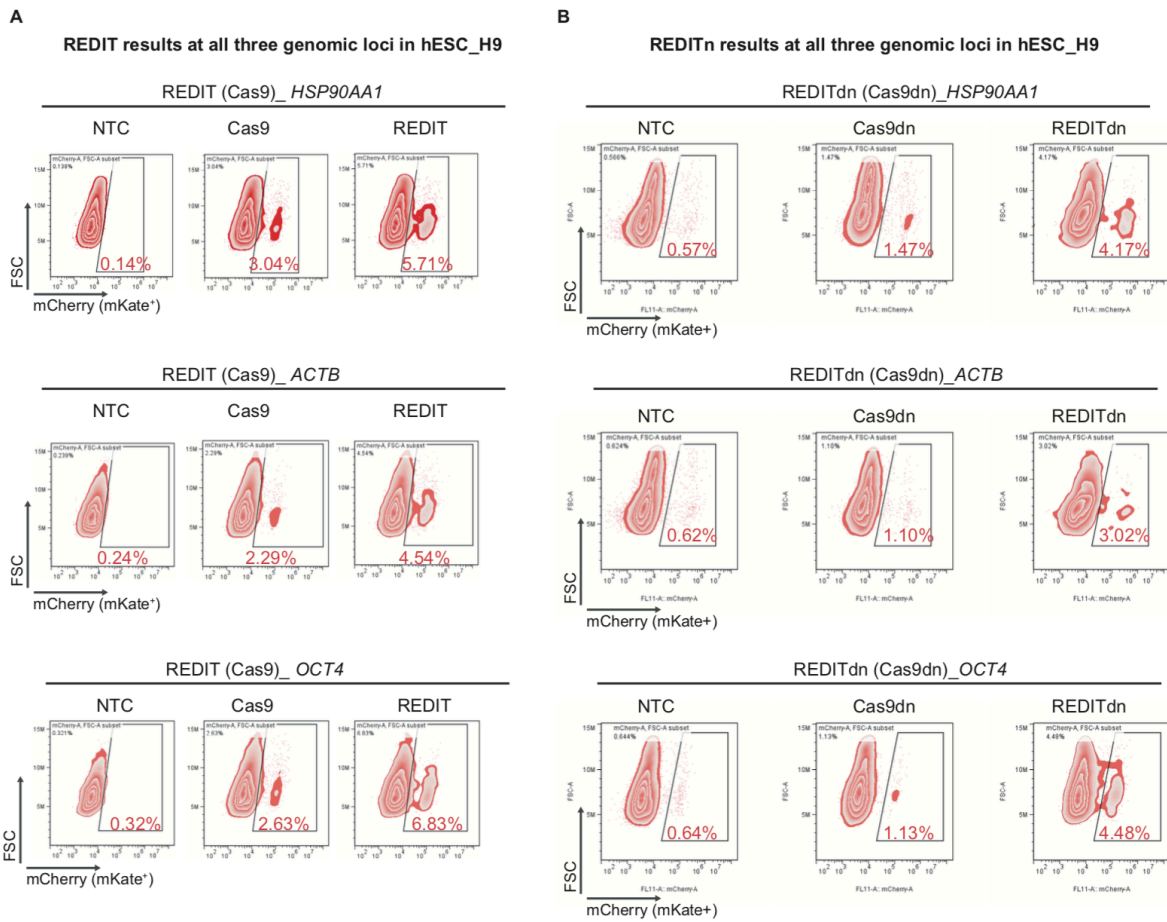

**Fig. S10 Flow cytometry analysis of mKate knock-in experiments in human embryonic stem cells (hESC, H9)**

(A-B) Original flow cytometry plots of mKate knock-in events at all three genomic loci: *HSP90AA1*, *ACTB*, *OCT4* (*POU5F1*), showing the stimulation of HDR efficiencies when using REDIT and REDITdn versus Cas9 and Cas9dn, respectively, along with negative controls.

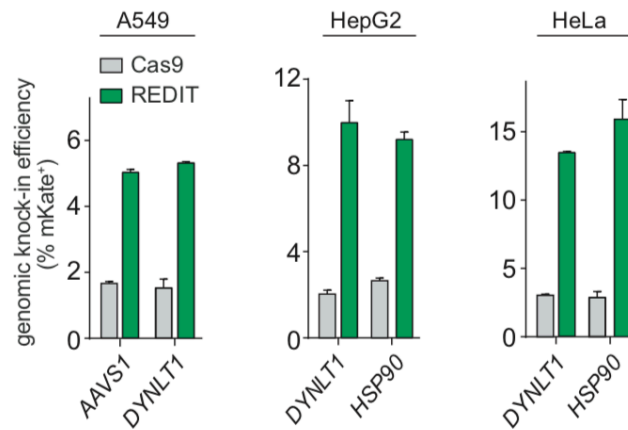

**Fig. S11 Validation of the REDIT gene-editing method across different cell types**

Measuring knock-in efficiencies using REDIT in A549, HepG2, HeLa, and compared with Cas9 reference using the same setup (donor DNA contains ~200bp of HA each side).

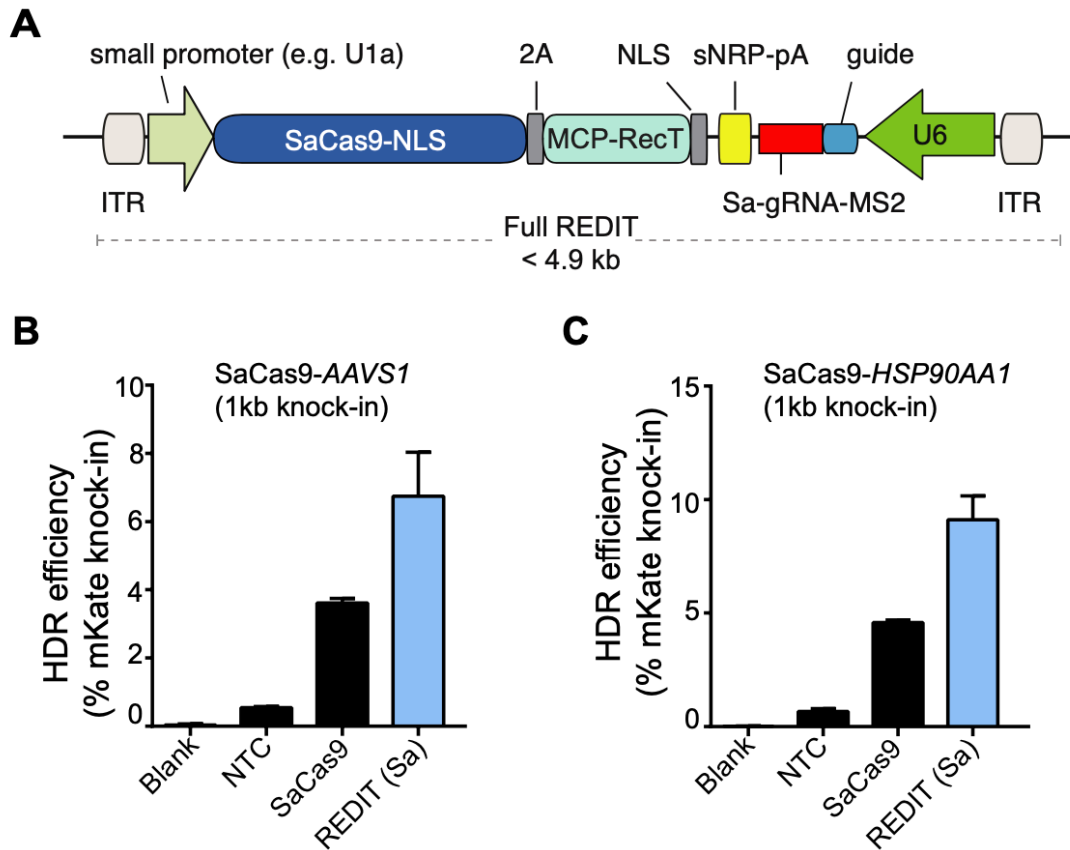

**Fig. S12 REDIT (RecT) tool compatibility with the compact SaCas9 system**

(A) Diagram of saCas9 express vector that has a small size that could potentially fit into a single AAV vector. Relative mKate knock-in efficiency at (B) *AAVS1* and (C) *HSP90AA1* locus using RecT protein in SaCas9 system. NTC, non-targeting negative control.

**Table S1. Sequence for gRNAs**

Annotations of the guideRNA names are: guides starting with sp indicate SpCas9 guide RNA targets, and guides starting with **nsp** indicate SpCas9 nickase guide RNA targets.

| guideRNA Name       | Genomic target  | Guide sequence       |
|---------------------|-----------------|----------------------|
| sp-EMX1             | <i>EMX1</i>     | GTCACCTCCAATGACTAGGG |
| sp-VEGFA            | <i>VEGFA</i>    | GGTGAGTGAGTGTGTGCGTG |
| sp-DYNLT1           | <i>DYNLT1</i>   | AAGGCCATAGGCTGGACTGC |
| sp-HSP90AA1         | <i>HSP90AA1</i> | GTAGACTAATCTCTGGCTGA |
| sp-OCT4             | <i>OCT4</i>     | TCTCCCATGCATTCAAAGT  |
| sp-AAVS1            | <i>AAVS1</i>    | ACCCACAGTGGGGCCACTA  |
| sp-ACTB             | <i>ACTB</i>     | CCACCGCAAATGCTTCTAGG |
| nsp-DYNLT1-guide1   | <i>DYNLT1</i>   | AAGGCCATAGGCTGGACTGC |
| nsp-DYNLT1-guide2   | <i>DYNLT1</i>   | GGCACTGACGATGCAGTACA |
| nsp-HSP90AA1-guide1 | <i>HSP90AA1</i> | GTAGACTAATCTCTGGCTGA |

|                     |                 |                      |
|---------------------|-----------------|----------------------|
| nsp-HSP90AA1-guide2 | <i>HSP90AA1</i> | TCGTCATCTCCTTCAAGGGG |
| nsp-OCT4-guide1     | <i>OCT4</i>     | ATGCATGGGAGAGCCCAGAG |
| nsp-OCT4-guide2     | <i>OCT4</i>     | GCCTGCCCTTCTAGGAATGG |
| nsp-ACTB-guide1     | <i>ACTB</i>     | CCACCGCAAATGCTTCTAGG |
| nsp-ACTB-guide2     | <i>ACTB</i>     | GCTTGCTGATCCACATCTGC |

**Table S2. Primer Sequences.**

Sequences for primers used for DNA template generation, targeted sequencing, and NGS assays are listed below. All NGS adapter sequences are shown in red color.

| Primer name        | Usage        | Genomic Target | Primer sequence              |
|--------------------|--------------|----------------|------------------------------|
| EMX1-PCR-F         | PCR template | <i>EMX1</i>    | CATTCTGCCTCTCTGTATGGAAAAGAGC |
| EMX1-PCR-R         | PCR template | <i>EMX1</i>    | CCCATTGAACTACCTGGGCCTGATTC   |
| VEGFA-PCR-F        | PCR template | <i>VEGFA</i>   | AGGTTTGAATCATCACGCAGGC       |
| VEGFA-PCR-R        | PCR template | <i>VEGFA</i>   | ATTCAAGTGGGGAATGGCAAGC       |
| DYNLT1-PCR-100bp-F | PCR template | <i>DYNLT1</i>  | TGCCGTAATGCTGCTCTCT          |
| DYNLT1-PCR-200bp-F | PCR template | <i>DYNLT1</i>  | AGACTTGCCAAGGTTCTTTGTG       |
| DYNLT1-PCR-400bp-F | PCR template | <i>DYNLT1</i>  | AGTGACCTGTGTAATTATGCAGAAG    |

|                    |              |               |                                 |
|--------------------|--------------|---------------|---------------------------------|
| DYNLT1-PCR-100bp-R | PCR template | <i>DYNLT1</i> | TGAAAGTGCCACAAAACAAAGAGA        |
| DYNLT1-PCR-200bp-R | PCR template | <i>DYNLT1</i> | AAGACAAGTGGCAACGCAG             |
| DYNLT1-PCR-400bp-R | PCR template | <i>DYNLT1</i> | CGTTTATGATACTATGCAGACTATGAAGAAC |
| DYNLT1-PCR-50-F    | PCR template | <i>DYNLT1</i> | GGAGAATAAGACCATGTACTGC          |
| DYNLT1-PCR-50-R    | PCR template | <i>DYNLT1</i> | GAGGATGAACTAGAGACAAAAGG         |
| DYNLT1-PCR-25-F    | PCR template | <i>DYNLT1</i> | TCAGTGCCTTCGGACTG               |
| DYNLT1-PCR-25-R    | PCR template | <i>DYNLT1</i> | AAAGGCCATAGGCaGGAC              |
| DYNLT1-PCR-10-F    | PCR template | <i>DYNLT1</i> | ACTGTCTATTGGAAGCGGA             |
| DYNLT1-PCR-10-R    | PCR template | <i>DYNLT1</i> | GGACAGCTGGTTAGGAATTAAG          |
| mKate-PCR-0-F      | PCR template | <i>DYNLT1</i> | GGAAGCGGAGCTACTAACTT            |

|                      |              |                 |                            |
|----------------------|--------------|-----------------|----------------------------|
| mKate-PCR-0-R        | PCR template | <i>DYNLT1</i>   | TTAGGAATTAAGTTTGTGCCCC     |
| HSP90AA1-PCR-100bp-F | PCR template | <i>HSP90AA1</i> | ATGAAGATGACCCTACTGCTGAT    |
| HSP90AA1-PCR-200bp-F | PCR template | <i>HSP90AA1</i> | TACTGTCTTGAAAGCAGATAGAAACC |
| HSP90AA1-PCR-600bp-F | PCR template | <i>HSP90AA1</i> | GCAGCAAAGAAACACCTGGA       |
| HSP90AA1-PCR-100bp-R | PCR template | <i>HSP90AA1</i> | GTTGTCATGCCATACAGACTTTTT   |
| HSP90AA1-PCR-200bp-R | PCR template | <i>HSP90AA1</i> | AGCATTACTAGCTCTGCTTTAGTG   |
| HSP90AA1-PCR-600bp-R | PCR template | <i>HSP90AA1</i> | TCCACAAGACTGGGTCTGAG       |
| HSP90AA1-PCR-50bp-F  | PCR template | <i>HSP90AA1</i> | AAATGCCACCCCTTGAAGG        |
| HSP90AA1-PCR-50bp-R  | PCR template | <i>HSP90AA1</i> | ATCAGAGGAATTGTAGAGTACTGA   |
| HSP90AA1-PCR-25bp-F  | PCR template | <i>HSP90AA1</i> | ACACATCACGCATGGAAGA        |



|                     |              |                 |                            |
|---------------------|--------------|-----------------|----------------------------|
| HSP90AA1-PCR-25bp-R | PCR template | <i>HSP90AA1</i> | GGTAAGTCATCCCTCAGCC        |
| HSP90AA1-PCR-10bp-F | PCR template | <i>HSP90AA1</i> | AGAAGTAGACGGAAGCGG         |
| HSP90AA1-PCR-10bp-F | PCR template | <i>HSP90AA1</i> | AGCCACAGATTTAGGAATTAAGTTT  |
| OCT4-PCR-F          | PCR template | <i>OCT4</i>     | GCGACTATGCACAACGAGAGG      |
| OCT4-PCR-R          | PCR template | <i>OCT4</i>     | AAGTGTGTCTATCTACTGTGTCCCAG |
| AAVS1-PCR-F         | PCR template | <i>AAVS1</i>    | GATGCTCTTTCCGGAGCACT       |
| AAVS1-PCR-R         | PCR template | <i>AAVS1</i>    | GCCAAGGACTCAAACCCAGAA      |
| ACTB-PCR-F          | PCR template | <i>ACTB</i>     | TGTGGTGTGTGGGGAGCT         |
| ACTB-PCR-R          | PCR template | <i>ACTB</i>     | TTACACGAAAGCAATGCTATCACCTC |
| DYNLT1 KI PCR-F     | Junction PCR | <i>DYNLT1</i>   | AGGAGGTCCCATCAGATGCT       |

|                          |              |                  |                                                   |
|--------------------------|--------------|------------------|---------------------------------------------------|
| HSP90AA1 KI PCR-F        | Junction PCR | <i>HSP90AA1</i>  | GGCTGGACAGCAAACATGGA                              |
| AAVS1 KI PCR-F           | Junction PCR | <i>AAVS1</i>     | GATGCTCTTTCCGGAGCACT                              |
| Junction PCR universal-R | Junction PCR | <i>mKate</i>     | TTGCTGCCGTACATGAAGCTG                             |
| EMX1-NGS-F               | NGS          | <i>EMX1</i>      | CCATCTCATCCCTGCGTGTCTCCAGAAGAA<br>GGGCTCCCATCAC   |
| EMX1-NGS-R               | NGS          | <i>EMX1</i>      | CCTCTCTATGGGCAGTCGGTGATGAGCAGC<br>AAGCAGCACTCTG   |
| VEGFA-NGS-F              | NGS          | <i>VEGFA</i>     | CCATCTCATCCCTGCGTGTCTCCAGCGTCT<br>TCGAGAGTGAGG    |
| VEGFA-NGS-R              | NGS          | <i>VEGFA</i>     | CCTCTCTATGGGCAGTCGGTGATGTTGGAA<br>TCCTGGAGTGACCC  |
| EMX-OT1-F                | Off Target   | <i>EMX1 OT-1</i> | CCATCTCATCCCTGCGTGTCTCCACAAAAGC<br>TCCACATGCTAGGA |
| EMX-OT1-R                | Off Target   | <i>EMX1 OT-1</i> | CCTCTCTATGGGCAGTCGGTGATGGCTGAC<br>TTTGGGCTCCTTCT  |
| EMX-OT2-F                | Off Target   | <i>EMX1 OT-2</i> | CCATCTCATCCCTGCGTGTCTCCACACACTC<br>CCCAGGATCTCA   |

|                          |              |            |                                                   |
|--------------------------|--------------|------------|---------------------------------------------------|
| EMX-OT2-R                | Off Target   | EMX1 OT-2  | CCTCTCTATGGGCAGTCGGTGATGAATGTC<br>AGCTGAAGCAGGCT  |
| EMX-OT3-F                | Off Target   | EMX1 OT-3  | CCATCTCATCCCTGCGTGTCTCCGGCTACC<br>CTGACAACCTGCTT  |
| EMX-OT3-R                | Off Target   | EMX1 OT-3  | CCTCTCTATGGGCAGTCGGTGATGAGGACA<br>GACATGACAAGGCA  |
| VEGFA-OT1-F              | Off Target   | VEGFA OT-1 | CCATCTCATCCCTGCGTGTCTCCGCAGGCA<br>AGCTGTCAAGGGT   |
| VEGFA-OT1-R              | Off Target   | VEGFA OT-1 | CCTCTCTATGGGCAGTCGGTGATGCCCTCA<br>CACCCACACCCTCA  |
| VEGFA-OT2-F              | Off Target   | VEGFA OT-2 | CCATCTCATCCCTGCGTGTCTCCGGAGGGG<br>TGTCATCGTTCTG   |
| VEGFA-OT2-R              | Off Target   | VEGFA OT-2 | CCTCTCTATGGGCAGTCGGTGATGCAAATT<br>GCGCCATAGCTGGG  |
| VEGFA-OT3-F              | Off Target   | VEGFA OT-3 | CCATCTCATCCCTGCGTGTCTCCTGAGCGC<br>TCTTCGTCTTTCC   |
| VEGFA-OT3-R              | Off Target   | VEGFA OT-3 | CCTCTCTATGGGCAGTCGGTGATGGCCAGG<br>AACACAGGAATGCTA |
| Junction NGS-5' common-R | Junction NGS | mKate      | CCTCTCTATGGGCAGTCGGTGATGTACAG<br>CTTCATGTGCATGT   |

|                            |              |                       |                                                   |
|----------------------------|--------------|-----------------------|---------------------------------------------------|
| Junction NGS-3' common-F   | Junction NGS | <i>mKate</i>          | CCATCTCATCCCTGCGTGTCTCCGAGGCCG<br>ACAAAGAGACA     |
| DYNLT1-Junction NGS-5'-F   | Junction NGS | <i>DYNLT1-mKate</i>   | CCATCTCATCCCTGCGTGTCTCCGTAATGC<br>TGCTCTCTTCCC    |
| DYNLT1-Junction NGS-3'-R   | Junction NGS | <i>DYNLT1-mKate</i>   | CCTCTCTATGGGCAGTCGGTGATGTTGTGA<br>AAGTGCCACAAAACA |
| HSP90AA1-Junction NGS-5'-F | Junction NGS | <i>HSP90AA1-mKate</i> | CCATCTCATCCCTGCGTGTCTCCCTACTGCT<br>GATGATACCAGTG  |
| HSP90AA1-Junction NGS-3'-R | Junction NGS | <i>HSP90AA1-mKate</i> | CCTCTCTATGGGCAGTCGGTGATGGTTGTC<br>ATGCCATACAGACT  |
| DYNLT1-TA-F                | TA colony    | <i>DYNLT1</i>         | AGTGGACAGAATGACATTTGTG                            |
| DYNLT1-TA-R                | TA colony    | <i>DYNLT1</i>         | CGCCTGGTCTGGTTGTATA                               |
| HSP90AA1-TA-F              | TA colony    | <i>HSP90AA1</i>       | AGACACATGCTAACAGGATCTA                            |
| HSP90AA1-TA-R              | TA colony    | <i>HSP90AA1</i>       | ATGCAGAATTGTCAACTACAGG                            |



**Table S3. Sequence for all SSAP tested in this study.**

| SSAP name | amino acid sequence                                                                                                                                                                                                                                                                                  |
|-----------|------------------------------------------------------------------------------------------------------------------------------------------------------------------------------------------------------------------------------------------------------------------------------------------------------|
| CspRecT   | MNQIVKFTDDSGLAVQVTPDDVRRYICENATEKEVGLFLQLCQTQRLNPFVKD<br>AYLVKYGGAPASMITSYQVFNRRACRDANYDGIKSGVVLRDGDVVHKRGAA<br>CYKKAGEELIGGWAEVRFKDGRETAYAEVALDDYSTGKSNWAKMPGVMIEK<br>CAKAAAWRLAFPDTFQGMYAAEEMDQAQQPEQVRAQAEQPVDLQPIRELFK<br>PYCEHFGITPAEGMTAVCGAVGAEGMHSMTTEQQARRARAWMEEEMAAPAV<br>EAEYEVVDEGEVF   |
| PapRecT   | MGTALTPLLTKFATRYEMGTTPEEVANTLKQTCFKGQVND SQMVALLIVADQY<br>KLNPFTEKELYAFPDKNNGIVPVVGVGDGWARIINENPQFDGMEFSMDQQGTEC<br>TCKIYRKDRSHAISATEYMAECKRNTQPWQSHPRRMLRHKAMIQCARLAFGF<br>AGIYDQDEAERIVERDVTAEQYEDVSEAICLIKDSPTMEDLQAAFSNAWKAY<br>KTKGARDQLTAAKDQRKKELLDAPIDVEFEETGDDRAA                           |
| EcRecT    | MTKQPPIAKADLQKTQGNRAPAAIKNNDVISFINQPSMKEQLAAALPRHMTAE<br>RMIRIATTEIRKVPALGNCDTMSFVSAIVQCSQLGLEPGSALGHAYLLPFGNKN<br>EKSGKKNVQLIIGYRGMIDLARRSGQIASLSARVVREGDEFNFEFGLDEKLIHR<br>PGENEDAPVTHVYAVARLKDGGTQFEVMTRKQIELVRSQSKAGNNGPWVTH<br>WEEMAKKTAIRRLF KYLPVSIQRAVSMDEKEPLTIDPADSSVLTGEYSVIDNS<br>EE     |
| PasRecT   | MSNQPIIASADLQKANTGKQVANKTPEQTLVGFMNQPAMKSQLAAALPRHM<br>TADRMIRIVTTEIRKTPALATCDQSSFIGAVVQCSQLGLEPGSALGHAYLLPFG<br>NGRSKSGQSNVQLIIGYRGMIDLARRSGQIVSLSARVVRADDEFNFEYGLDEN<br>LIHRPGENEDAPITHVYAVARLKDGGTQFEVMTVKQIEKVKQAQSKASSNGPWV<br>THWEEMAKKTVIRRLF KYLPVSIEMQKAVILDEKAESDQDNDASVLSAEYSVL<br>DGSSEE |
| SeRecT    | MTKQPPIAKADLQKTQENRAPAAIKNNDVISFINQPSMKEQLAAALPRHMTAE<br>RMIRIATTEIRKVPALGNCDTMSFVSAIVQCSQLGLEPGSALGHAYLLPFGNKN<br>EKSGKKNVQLIIGYRGMIDLARRSGQIASLSARVVREGDEFNFEFGLDEKLIHR<br>PGENEDAPVTHVYAVARLKDGGTQFEVMTRRQIELVRSQSKAGNNGPWVTH<br>WEEMAKKTAIRRLF KYLPVSIQRAVSMDEKEPLTIDPADSSVLTGEYSVIDNS<br>EE     |

|         |                                                                                                                                                                                                                                                                                                                                                                            |
|---------|----------------------------------------------------------------------------------------------------------------------------------------------------------------------------------------------------------------------------------------------------------------------------------------------------------------------------------------------------------------------------|
| AcRecT  | MTKQPPIAKADLQKTQGNRAPAAVNDKDVLCVINS PAMKAQLAAALPRHMTA<br>ERMIRIATTEIRKVP ELRNC DSTSFIGAIVQCSQLGLEPGSALGHAYLLPFGNGK<br>AKNGKKNVQLIIGYRGMIDLARRSGQIISLSARVVRECDEF SYELGLDEKLVHR<br>PGENEDAPITHVYAVAKLKDGGVQFEVMTKKQVEKVRDTHSKAAKNAASKGA<br>SSIWDEHFEDMAKKT VIRKLFKYLPVSIEIQRAVSM DGKEVETINPDDISVIAGE<br>YSVIDNPEE                                                            |
| SejRecT | MNAPQKQNTRAAVKKISPQEFAEQFAAIIPQVKS VLP AHVTFEKFERVVRLAVR<br>KNPDLLTCSPASLFMACIQAASDGLLPDGREGAIVSRWSSKKSCNEASWMPM<br>VAGLMKLARNSGDIASISSQVVFEGEHFRVVLGDEERIEHERDLGKTGGKIVA<br>AYAVARLKDGS DPIREIMSWGQIEKIRNTNKKWEWGPWKAWEDEMARKTVIR<br>RLAKRLPMSTDKEGERLRS AIERIDSLVDISANVDAPQIAADDEF AAAAHGVEP<br>QQIAAPDLIGRLAQM QSLEQVQDIEPQVSHAIQEADKRGDSDTANALDAALQS<br>ALSRTSTAKEEVPA |
| PsaRecT | MPKQPPIAKADLQKTQGARTPTAVKNNNDVISFINQPSMKEQLAAALPRHMTA<br>ERMIRIATTEIRKVPALGDCDTMSFVSAIVQCSQLGLEPGGALGHAYLLPFGNR<br>NEKSGKKNVQLIIGYRGMIDLARRSGQIASLSARVVREGDDFSFEFGLEEKLVH<br>RPGENEDAPVTHVYAVARLKDGGTQFEVMTRKQIELVRAQSKAGNNGPWVT<br>HWEEMAKKTAIRRLFKYLPVSIEIQRAVSMDEKETLTIDPADASVITGEYSVVEN<br>AGVEENVTA                                                                   |
| PhRecT  | MGHLVSKTEQDYIKQHYAKGATDQEF EFHFIGVCRARGLNPAANQIYFVKYRSK<br>DGPAPAFILSIDSLRLIAHRTGDYAGCSEPIFTDGGKACTVTVRRNLKSGETG<br>NFSGMAFYDEQVQQKNGRPTSFWQSKPRTMLEKCAEAKALRKAFPQDLGQF<br>YIREEMPPQYDEPIQVHKPKALEEPRFSKSDLSRRKGLNRKLSALGVDP SRFD<br>EVATFLDGTDPREL GQKLKLWLKEAGYGVNQ                                                                                                      |
| PraRecT | MNTDMIAMPPSPAISMLDTSKLDVMVRAAELMSQAVVMVPDHFKGKPADCLA<br>VVMQADQWGMNPF TVAQKTHLVSGTLGYESQLVNAVISSSKAIKGRFHYES<br>DGWERLAGKVQYVKESRQRKGGQGSYQVTVAKPTWKPEDEQGLWVR CGA<br>VLAGEKDITWGP KLYLASVLVRNSELWTTKPYQQAAYTALKDWSRLYTPAVM<br>QGSMTGKSWSLTGRLISPR                                                                                                                         |
| PabRecT | MSNQPPIASADLQKTQQSKQVANKTPEQTLVGF MNQPAMKSQLAAALPRHM<br>TADRMIRIVTTEIRKTPQLAQCDQSSFIGAVVQCSQLGLEPGSALGHAYLLPFG<br>NGRSKSGQSNVQLIIGYRGMIDLARRSGQIVSLSARVVRADDEF SF EYGLDEN                                                                                                                                                                                                  |

|         |                                                                                                                                                                                                                                                                                                      |
|---------|------------------------------------------------------------------------------------------------------------------------------------------------------------------------------------------------------------------------------------------------------------------------------------------------------|
|         | LVHRPGENEDAPITHVYAVARLKDGGTQFEVMTVKQVEKVKAQSKASSNGP<br>WVTHWEEMAKKTIVIRRLFKYLPVSIEMQKAVVLDEKAESDQDQDNASVLSAE<br>YSVLESGDEATN                                                                                                                                                                         |
| PadRecT | MSNQPPLATADLQKTQQSNQVAKTPEQTLVGFMNQPAMKSQLAAALPRHMT<br>ADRMIRIVTTEIRKTPALAQCDQSSFIGAVVQCSQLGLEPGSALGHAYLLPFGN<br>GRSKSGQSNVQLIIGYRGMIDLARRSGQIVSLSARVVRADDEFSFEYGLDENLI<br>HRPGDNESAPITHVYAVARLKDGGTQFEVMTAKQVEKVKAQSKASSNGPWV<br>THWEEMAKKTIVIRRLFKYLPVSIEMQKAVVLDEKAESDQDQDNASVLSAEYSV<br>LESGTGE  |
| PlsRecT | MSNQPIIASADLQKTQQSKQVANKTPEQTLVGFMNQPAMKSQLAAALPRHM<br>TADRMIRIVTTEIRKTPALATCDQSSFIGAVVQCSQLGLEPGSALGHAYLLPFG<br>NGRSKSGQSNVQLIIGYRGMIDLARRSGQIVSLSARVVRADDEFSFEYGLDEN<br>LIHRPGDNEDAPITHVYAVARLKDGGTQFEVMTAKQVEKVKAQSKASSNGPW<br>VTHWEEMAKKTIVIRRLFKYLPVSIEMQKAVVLDEKAESDQDQDNASVLSAEYS<br>VLEGDGGE |
| PrsRecT | MSNPPLAQADLQKTQGTEVKEKTKDQMLVELINKPSMKAQLAAALPRHMTPD<br>RMIRIVTTEIRKTPALATCDMQSFVGVAVVQCSQLGLEPGNALGHAYLLPFGNG<br>KSKSGQSNVQLIIGYRGMIDLARRSGQIVSISARTVRQGDNFHFEYGLNENLTH<br>VPGENEDSPITHVYAVARLKDGGVQFEVMTYNQIEKVRASSKAGQNGPWVS<br>HWEEMAKKTIVIRRLFKYLPVSIEMQKAVILDEKAEANIDQENATIFEGEYEEVG<br>TDGK   |
| PrRecT  | MSNPPLAQSDLQKTQGTEVKVTKDQQLIQFINQPSMKAQLAAALPRHMTPD<br>RMIRIVTTEIRKTPALATCDMQSFVGVAVVQCSQLGLEPGNALGHAYLLPFGNG<br>KAKSGQSNVQLIIGYRGMIDLARRSNQIISISARTVRQGDNFHFEYGLNEDLTH<br>TPSENEEDSPITHVYAVARLKDGGVQFEVMTYNQVEKVRASSKAGQNGPWVS<br>HWEEMAKKTIVIRRLFKYLPVSIEMQKAVVLDEKAEANVDQENATIFEGEYEEV<br>GTDGN   |
| ShpRecT | MKAQLAAALPKHITSDRMIRIVSTEIRKTPSLANCDIQSFIGAVVQCSQLGLEPG<br>NALGHAYLLPFGNGKSDNGKSNVQLIIGYRGMIDLARRSGQIISISARTVRQGD<br>NFHFEYGLNENLTHIPEGNEEDSPITHVYAVARLKDEGVQFEVMTYNQIEKVRD<br>SSKAGKNGPWVTHWEEMAKKTIVIRRLFKYLPVSIEMQKAVILDEKAEANIEQD<br>HSAIFEAEEFEEVDSNGN                                          |



|         |                                                                                                                                                                                                                                                                                                                           |
|---------|---------------------------------------------------------------------------------------------------------------------------------------------------------------------------------------------------------------------------------------------------------------------------------------------------------------------------|
| BaRecT  | MQTAQVKLSVPHQQVYQDNFNLYLSSQVVGHLVDLNEEIGYLNQIVFNSLSTAS<br>PLDVAAPWSVYGLLLNVCRLGLSLNPEKKLAYVMPSWSETGEIIMKLYPGYRG<br>EIAIASNFNVIKNANAVLVYENDHFRIQAATGEIEHFVTSLSIDPRVRGACSGGY<br>CRSVLMDNTIQISYLSIEEMNAIAQNQIEANMGNTPWNSIWRTEMNRVALYRR<br>AAKDWRQLIKATPEIQSALSDEY                                                            |
| ShsRecT | MSKQLTTVNTQAVVGTFSQAELDTLKQTIKGTNEQFALFVQTCANSRLNPF<br>LNHIHCIVYNGKEGATMSLQIAVEGILYLARKTDGYKGIECQLIHENDEFKFDK<br>SKEVDHQIGFPRGNVIGGYAIAKREGFDDVVVLMESNEVDHMLKGRNGHMW<br>RDWFNDMFKKHIMKRAAKLQYGIEIAEDETSSGSPVDNIPEYKPKPRKDITP<br>NQDVIDAPPQPKQDDEAAKLKAARSEVSKKFKKL GIVKEDQTEYVEKHVPGF<br>KGTLSDFIGLSQLLDLNIEAQEAQSADGDLDD |
